# Supplementary material
Source: publisher figshare collection journal article supplement (https://diabetesjournals.figshare.com/ndownloader/files/31115197)
Supplement: Supplementary file 1 [file 31115197]

## **Supplementary material**

### **Supplement to: Obesity partially mediates the diabetogenic effect of lowering low-density lipoprotein cholesterol.**

**Authors:** Peitao Wu, Jee-Young Moon, Iyas Daghlas, Giulianini Franco, Bianca C. Porneala, Fariba Ahmadizar, Tom G. Richardson, Jonas L. Isaksen, Georgy Hindy, Jie Yao, Colleen M. Sitlani, Laura M. Raffield, Lisa R Yanek, Mary F. Feitosa, Rafael R. C. Cuadrat, Qibin Qi, Arfan Ikram, Christina Ellervik, Ulrika Ericson, Mark Goodarzi, Jennifer A. Brody, Leslie Lange, Josep M Mercader, Dhananjay Vaidya, Ping An, Matthias B. Schulze, Lluís Masana, Mohsen Ghanbari, Morten S. Olesen, Jianwen Cai, Xiuqing Guo, James S. Floyd, Susanne Jäger, Michael A. Province, Rita R Kalyani, Bruce M. Psaty, Marju Orho-Melander, Paul M Ridker, Jørgen K. Kanter, Andre Uitterlinden, George Davey Smith, Dipender Gill, BMBCh, Robert C. Kaplan, Maryam Kavousi, Sridharan Raghavan, Daniel I. Chasman, Jerome I. Rotter, James B. Meigs, Jose C. Florez, Josée Dupuis, Ching-Ti Liu, Jordi Merino.

**Address for Correspondence:** Jordi Merino, PhD. Diabetes Unit and Center for Genomic Medicine, Massachusetts General Hospital, 185 Cambridge Street, Boston, MA 02114 Email: [jmerino@mgh.harvard.edu](mailto:jmerino@mgh.harvard.edu)

## Table of Contents:

|                                                                                                                           |    |
|---------------------------------------------------------------------------------------------------------------------------|----|
| <b>Supplementary Table 1:</b> Genetic variants used to proxy LDLc. ....                                                   | 3  |
| <b>Supplementary Table 2:</b> Genetic variants used to proxy BMI. ....                                                    | 9  |
| <b>Supplementary Table 3:</b> Characteristics of participants included in individual-level MR analyses. ....              | 11 |
| <b>Supplementary Table 4:</b> Genetic variants used in the multivariable MR analysis to proxy LDLc and BMI. ....          | 12 |
| <b>Supplementary Table 5:</b> Mendelian randomization estimates in sensitivity analyses. ....                             | 19 |
| <b>Supplementary Table 6:</b> Sensitivity analysis to investigate potential causal reversal effects on MR estimates. .... | 20 |
| <b>Supplementary Figure 1:</b> Association of LDLc lowering genetic variants at LDLc drug targets with T2D and BMI. ....  | 21 |
| <b>Supplementary Figure 2:</b> Effect of genetically predicted low LDLc on T2D odds in individual-level MR analyses. .... | 22 |
| <b>Supplementary Figure 3:</b> Effect of a genetically predicted low LDLc on BMI in individual-level MR analyses. ....    | 23 |
| <b>Supplementary Figure 4:</b> Effect of a genetically predicted BMI on T2D odds in individual-level MR analyses. ....    | 24 |
| <b>Appendix 1:</b> .....                                                                                                  | 25 |
| <b>Appendix 2:</b> .....                                                                                                  | 29 |
| <b>Appendix 3:</b> .....                                                                                                  | 32 |

**Supplementary Table 1: Genetic variants used to proxy LDLc.**

| SNP         | CHR | BP        | EA | NEA | EAF   | BETA   | SE    |
|-------------|-----|-----------|----|-----|-------|--------|-------|
| rs880315    | 1   | 10736809  | T  | C   | 0.660 | 0.015  | 0.002 |
| rs6693893   | 1   | 109255141 | T  | C   | 0.965 | 0.075  | 0.006 |
| rs4970834   | 1   | 109272258 | C  | T   | 0.813 | 0.105  | 0.003 |
| rs115458560 | 1   | 109519352 | T  | C   | 0.981 | 0.050  | 0.008 |
| rs77257036  | 1   | 150503710 | C  | T   | 0.648 | 0.012  | 0.002 |
| rs4661359   | 1   | 16186658  | C  | T   | 0.377 | -0.013 | 0.002 |
| rs1434282   | 1   | 199041592 | C  | T   | 0.275 | -0.015 | 0.002 |
| rs2642438   | 1   | 220796686 | A  | G   | 0.297 | -0.025 | 0.002 |
| rs6678608   | 1   | 224511398 | T  | C   | 0.784 | 0.014  | 0.003 |
| rs7551124   | 1   | 23459267  | C  | T   | 0.125 | -0.019 | 0.003 |
| rs10910476  | 1   | 234599210 | C  | T   | 0.445 | -0.012 | 0.002 |
| rs556107    | 1   | 234717312 | C  | T   | 0.477 | -0.035 | 0.002 |
| rs28631087  | 1   | 234973467 | T  | C   | 0.787 | 0.016  | 0.003 |
| rs35189848  | 1   | 25461931  | A  | G   | 0.555 | 0.026  | 0.002 |
| rs75460349  | 1   | 26853597  | A  | C   | 0.977 | -0.056 | 0.007 |
| rs55637835  | 1   | 55000630  | C  | T   | 0.879 | 0.019  | 0.003 |
| rs11591147  | 1   | 55039974  | G  | T   | 0.983 | 0.349  | 0.008 |
| rs472495    | 1   | 55055640  | G  | T   | 0.351 | -0.043 | 0.002 |
| rs111928762 | 1   | 55228515  | A  | G   | 0.960 | -0.051 | 0.005 |
| rs2994562   | 1   | 56332125  | A  | G   | 0.407 | -0.013 | 0.002 |
| rs1168086   | 1   | 62646718  | A  | G   | 0.352 | -0.039 | 0.002 |
| rs1556562   | 1   | 92568466  | G  | T   | 0.210 | -0.019 | 0.002 |
| rs2718717   | 2   | 108589683 | A  | G   | 0.857 | -0.019 | 0.003 |
| rs150474434 | 2   | 118087545 | G  | A   | 0.899 | 0.035  | 0.003 |
| rs17050272  | 2   | 120548864 | G  | A   | 0.591 | 0.021  | 0.002 |
| rs4954192   | 2   | 134875411 | C  | T   | 0.627 | -0.015 | 0.002 |
| rs4556933   | 2   | 157587377 | G  | A   | 0.603 | 0.011  | 0.002 |
| rs2287622   | 2   | 168973818 | A  | G   | 0.397 | 0.021  | 0.002 |
| rs7569317   | 2   | 202663256 | T  | C   | 0.469 | -0.018 | 0.002 |
| rs719148    | 2   | 20321886  | G  | A   | 0.224 | 0.018  | 0.002 |
| rs77370158  | 2   | 20823505  | A  | G   | 0.916 | -0.025 | 0.004 |
| rs62122481  | 2   | 20993943  | C  | A   | 0.623 | -0.066 | 0.002 |
| rs72902590  | 2   | 21066196  | G  | A   | 0.955 | 0.080  | 0.005 |
| rs62131701  | 2   | 21342131  | A  | G   | 0.927 | -0.034 | 0.004 |
| rs1250258   | 2   | 215435462 | C  | T   | 0.263 | -0.014 | 0.002 |
| rs11568318  | 2   | 233756852 | C  | A   | 0.934 | -0.026 | 0.004 |
| rs1731243   | 2   | 26707543  | C  | T   | 0.393 | -0.013 | 0.002 |
| rs1260326   | 2   | 27508073  | T  | C   | 0.396 | 0.035  | 0.002 |
| rs56236159  | 2   | 3588888   | T  | G   | 0.869 | -0.018 | 0.003 |
| rs4299376   | 2   | 43845437  | G  | T   | 0.323 | 0.054  | 0.002 |

|             |   |           |   |   |       |        |       |
|-------------|---|-----------|---|---|-------|--------|-------|
| rs6709904   | 2 | 43853185  | A | G | 0.887 | 0.044  | 0.003 |
| rs13020929  | 2 | 44100324  | G | A | 0.543 | -0.015 | 0.002 |
| rs4671050   | 2 | 62761034  | G | T | 0.684 | 0.020  | 0.002 |
| rs12471768  | 2 | 64701469  | T | C | 0.296 | -0.014 | 0.002 |
| rs3732359   | 3 | 119817582 | G | A | 0.220 | 0.017  | 0.003 |
| rs9841897   | 3 | 122563722 | T | C | 0.844 | -0.019 | 0.003 |
| rs13076933  | 3 | 12285932  | T | G | 0.741 | 0.021  | 0.002 |
| rs78946096  | 3 | 132469319 | A | G | 0.942 | 0.039  | 0.004 |
| rs3905668   | 3 | 136212744 | A | G | 0.724 | -0.014 | 0.002 |
| rs11709868  | 3 | 142930002 | G | T | 0.703 | 0.015  | 0.002 |
| rs9834932   | 3 | 32493890  | A | G | 0.911 | 0.032  | 0.004 |
| rs11706420  | 3 | 58406684  | A | G | 0.917 | 0.028  | 0.004 |
| rs55921103  | 3 | 69761143  | G | T | 0.351 | -0.014 | 0.002 |
| rs13107325  | 4 | 102267552 | C | T | 0.925 | 0.025  | 0.004 |
| rs2705453   | 4 | 155582205 | A | G | 0.479 | 0.012  | 0.002 |
| rs13108218  | 4 | 3442204   | A | G | 0.385 | 0.018  | 0.002 |
| rs9884390   | 4 | 68507689  | T | C | 0.766 | -0.025 | 0.002 |
| rs72663045  | 4 | 73311680  | T | G | 0.979 | -0.037 | 0.007 |
| rs1458038   | 4 | 80243569  | C | T | 0.709 | 0.019  | 0.002 |
| rs1229984   | 4 | 99318162  | T | C | 0.027 | -0.053 | 0.006 |
| rs7734476   | 5 | 123513182 | G | A | 0.450 | -0.019 | 0.002 |
| rs1003533   | 5 | 132419959 | C | T | 0.812 | 0.018  | 0.003 |
| rs58198139  | 5 | 156972028 | C | T | 0.366 | -0.032 | 0.002 |
| rs146433259 | 5 | 34713687  | C | T | 0.988 | 0.057  | 0.010 |
| rs116734477 | 5 | 52799190  | C | T | 0.959 | 0.047  | 0.005 |
| rs9686661   | 5 | 56565959  | C | T | 0.799 | -0.015 | 0.003 |
| rs889235    | 5 | 72658576  | G | A | 0.787 | 0.019  | 0.003 |
| rs7707394   | 5 | 75177114  | G | A | 0.643 | -0.041 | 0.002 |
| rs12916     | 5 | 75360714  | T | C | 0.599 | -0.062 | 0.002 |
| rs17185536  | 6 | 100173055 | C | T | 0.754 | 0.017  | 0.002 |
| rs3822855   | 6 | 115995719 | G | T | 0.598 | -0.018 | 0.002 |
| rs9491699   | 6 | 127150388 | C | T | 0.522 | -0.014 | 0.002 |
| rs12197047  | 6 | 130068066 | G | A | 0.330 | -0.014 | 0.002 |
| rs7776054   | 6 | 135097778 | A | G | 0.739 | 0.016  | 0.002 |
| rs12208357  | 6 | 160122116 | C | T | 0.930 | -0.057 | 0.004 |
| rs146534110 | 6 | 160157037 | G | T | 0.987 | -0.068 | 0.009 |
| rs3127580   | 6 | 160289819 | C | T | 0.845 | -0.036 | 0.003 |
| rs12179053  | 6 | 160290534 | C | T | 0.748 | 0.017  | 0.002 |
| rs117733303 | 6 | 160501838 | A | G | 0.982 | -0.084 | 0.008 |
| rs118039278 | 6 | 160564494 | G | A | 0.921 | -0.084 | 0.004 |
| rs2235215   | 6 | 16130925  | T | C | 0.696 | 0.023  | 0.002 |
| rs79220007  | 6 | 26098246  | T | C | 0.924 | 0.057  | 0.004 |
| rs2893936   | 6 | 27820406  | T | C | 0.913 | 0.035  | 0.004 |

|             |    |           |   |   |       |        |       |
|-------------|----|-----------|---|---|-------|--------|-------|
| rs28782316  | 6  | 29879365  | T | G | 0.451 | -0.024 | 0.003 |
| rs2187980   | 6  | 30255736  | A | G | 0.856 | -0.027 | 0.003 |
| rs2229094   | 6  | 31572779  | T | C | 0.746 | -0.018 | 0.002 |
| rs115563246 | 6  | 32521957  | G | A | 0.733 | 0.021  | 0.003 |
| rs17205170  | 6  | 32634706  | G | T | 0.819 | -0.038 | 0.003 |
| rs76967117  | 6  | 34635914  | G | A | 0.885 | 0.028  | 0.003 |
| rs913499    | 6  | 37070656  | A | G | 0.491 | 0.012  | 0.002 |
| rs2758879   | 6  | 39281360  | G | A | 0.699 | -0.012 | 0.002 |
| rs9471975   | 6  | 42951484  | T | C | 0.417 | 0.013  | 0.002 |
| rs11772705  | 7  | 100701281 | T | C | 0.712 | 0.017  | 0.002 |
| rs869412    | 7  | 1034498   | T | C | 0.774 | 0.014  | 0.003 |
| rs34927723  | 7  | 21383307  | C | T | 0.843 | 0.016  | 0.003 |
| rs55696093  | 7  | 21566355  | A | G | 0.782 | -0.033 | 0.003 |
| rs4722551   | 7  | 25952206  | T | C | 0.841 | -0.024 | 0.003 |
| rs67050321  | 7  | 36129593  | T | C | 0.696 | -0.015 | 0.002 |
| rs2073547   | 7  | 44542732  | A | G | 0.816 | -0.036 | 0.003 |
| rs4148826   | 7  | 87445103  | T | C | 0.820 | 0.016  | 0.003 |
| rs112758337 | 7  | 98347956  | G | A | 0.814 | 0.016  | 0.003 |
| rs2737265   | 8  | 115655407 | A | G | 0.720 | 0.020  | 0.002 |
| rs112875651 | 8  | 125494452 | G | A | 0.609 | 0.061  | 0.002 |
| rs11997161  | 8  | 140728488 | T | C | 0.482 | -0.012 | 0.002 |
| rs11786083  | 8  | 143976190 | G | A | 0.626 | -0.016 | 0.002 |
| rs1495741   | 8  | 18415371  | G | A | 0.221 | 0.017  | 0.003 |
| rs59328596  | 8  | 22070716  | G | A | 0.852 | 0.018  | 0.003 |
| rs117139027 | 8  | 29167426  | G | A | 0.982 | 0.057  | 0.008 |
| rs9298506   | 8  | 54524964  | A | G | 0.792 | -0.019 | 0.003 |
| rs4738684   | 8  | 58480714  | A | G | 0.335 | 0.032  | 0.002 |
| rs1365041   | 8  | 6706347   | G | T | 0.316 | -0.012 | 0.002 |
| rs9987289   | 8  | 9325848   | A | G | 0.091 | -0.045 | 0.004 |
| rs4841146   | 8  | 9432835   | C | A | 0.791 | -0.015 | 0.003 |
| rs2066714   | 9  | 104824472 | T | C | 0.871 | -0.021 | 0.003 |
| rs11789603  | 9  | 104884738 | C | T | 0.892 | -0.025 | 0.003 |
| rs2740488   | 9  | 104899461 | A | C | 0.735 | 0.025  | 0.002 |
| rs13289095  | 9  | 128704210 | G | T | 0.854 | 0.021  | 0.003 |
| rs2519093   | 9  | 133266456 | C | T | 0.815 | -0.056 | 0.003 |
| rs10448340  | 9  | 136425617 | T | G | 0.680 | 0.015  | 0.002 |
| rs6475606   | 9  | 22081851  | C | T | 0.516 | 0.020  | 0.002 |
| rs3780181   | 9  | 2640759   | A | G | 0.932 | 0.028  | 0.004 |
| rs6560499   | 9  | 76115850  | G | A | 0.424 | 0.012  | 0.002 |
| rs2250802   | 10 | 112161596 | G | A | 0.276 | 0.018  | 0.002 |
| rs72823013  | 10 | 114026474 | G | A | 0.874 | 0.022  | 0.003 |
| rs12246352  | 10 | 122945791 | A | G | 0.896 | -0.026 | 0.003 |
| rs1277763   | 10 | 18206956  | T | C | 0.204 | -0.015 | 0.003 |

|             |    |           |   |   |       |        |       |
|-------------|----|-----------|---|---|-------|--------|-------|
| rs79828839  | 10 | 50592671  | C | T | 0.801 | -0.015 | 0.003 |
| rs10822145  | 10 | 63174788  | C | T | 0.524 | -0.012 | 0.002 |
| rs16926246  | 10 | 69333636  | C | T | 0.870 | 0.020  | 0.003 |
| rs2068888   | 10 | 93079885  | G | A | 0.549 | 0.019  | 0.002 |
| rs10791660  | 11 | 104000311 | C | A | 0.815 | 0.016  | 0.003 |
| rs61905084  | 11 | 116739578 | T | C | 0.819 | 0.018  | 0.003 |
| rs3741298   | 11 | 116786845 | C | T | 0.192 | 0.042  | 0.003 |
| rs6589939   | 11 | 122647817 | A | G | 0.622 | -0.013 | 0.002 |
| rs59379014  | 11 | 126358105 | C | T | 0.927 | -0.055 | 0.004 |
| rs10128711  | 11 | 18611437  | T | C | 0.261 | -0.017 | 0.002 |
| rs7108486   | 11 | 5655928   | T | C | 0.976 | 0.039  | 0.007 |
| rs11601507  | 11 | 5679844   | C | A | 0.931 | -0.032 | 0.004 |
| rs174564    | 11 | 61820833  | A | G | 0.651 | 0.032  | 0.002 |
| rs11227247  | 11 | 65655382  | A | C | 0.865 | -0.018 | 0.003 |
| rs74869459  | 11 | 66529098  | T | C | 0.761 | 0.017  | 0.002 |
| rs3184504   | 12 | 111446804 | T | C | 0.483 | -0.027 | 0.002 |
| rs11066320  | 12 | 112468611 | A | G | 0.425 | -0.022 | 0.002 |
| rs11065385  | 12 | 120985583 | A | G | 0.309 | 0.024  | 0.002 |
| rs11057397  | 12 | 123935181 | C | T | 0.663 | 0.012  | 0.002 |
| rs112403212 | 12 | 124818708 | C | T | 0.859 | -0.017 | 0.003 |
| rs1007938   | 12 | 26649616  | A | G | 0.595 | -0.012 | 0.002 |
| rs2160994   | 12 | 50256274  | T | C | 0.353 | -0.018 | 0.002 |
| rs35882350  | 12 | 513963    | A | G | 0.739 | -0.014 | 0.002 |
| rs61754230  | 12 | 71785666  | C | T | 0.980 | -0.043 | 0.007 |
| rs78508096  | 12 | 8922110   | G | A | 0.774 | -0.018 | 0.002 |
| rs4771674   | 13 | 110386723 | A | G | 0.378 | -0.013 | 0.002 |
| rs6602912   | 13 | 113843576 | T | G | 0.715 | -0.022 | 0.002 |
| rs76428106  | 13 | 28029870  | T | C | 0.987 | 0.052  | 0.010 |
| rs9534323   | 13 | 32376120  | A | G | 0.477 | 0.016  | 0.002 |
| rs9316496   | 13 | 50467744  | G | A | 0.827 | -0.014 | 0.003 |
| rs11621792  | 14 | 24402720  | C | T | 0.547 | -0.019 | 0.002 |
| rs8008068   | 14 | 63766999  | A | G | 0.840 | -0.016 | 0.003 |
| rs6573971   | 14 | 70544752  | G | A | 0.445 | 0.013  | 0.002 |
| rs61988555  | 14 | 72972127  | T | C | 0.915 | 0.022  | 0.004 |
| rs12435583  | 14 | 74740989  | G | A | 0.557 | 0.011  | 0.002 |
| rs145730801 | 14 | 94301859  | T | C | 0.956 | -0.036 | 0.005 |
| rs72733982  | 15 | 57275452  | G | T | 0.940 | -0.026 | 0.004 |
| rs1532085   | 15 | 58391167  | A | G | 0.386 | 0.017  | 0.002 |
| rs261332    | 15 | 58435126  | A | G | 0.210 | 0.022  | 0.003 |
| rs62011285  | 15 | 63498864  | T | C | 0.657 | -0.012 | 0.002 |
| rs6495122   | 15 | 74833304  | A | C | 0.409 | -0.014 | 0.002 |
| rs12445804  | 16 | 11612244  | G | A | 0.925 | -0.023 | 0.004 |
| rs62033400  | 16 | 53777876  | A | G | 0.605 | 0.014  | 0.002 |

|             |    |          |   |   |       |        |       |
|-------------|----|----------|---|---|-------|--------|-------|
| rs3764261   | 16 | 56959412 | C | A | 0.676 | 0.033  | 0.002 |
| rs56212732  | 16 | 70896467 | C | T | 0.915 | 0.024  | 0.004 |
| rs62053078  | 16 | 71609769 | G | T | 0.626 | -0.017 | 0.002 |
| rs3794695   | 16 | 72063928 | C | T | 0.810 | -0.048 | 0.003 |
| rs7202323   | 16 | 72183214 | T | G | 0.770 | 0.026  | 0.002 |
| rs11149612  | 16 | 83947360 | C | T | 0.540 | 0.016  | 0.002 |
| rs4328458   | 16 | 86390687 | G | A | 0.556 | -0.011 | 0.002 |
| rs58926386  | 16 | 88505398 | G | A | 0.958 | -0.029 | 0.005 |
| rs704       | 17 | 28367840 | G | A | 0.524 | -0.015 | 0.002 |
| rs12453884  | 17 | 29533588 | T | C | 0.146 | -0.016 | 0.003 |
| rs12603885  | 17 | 31139704 | G | A | 0.300 | -0.018 | 0.002 |
| rs8065099   | 17 | 47556119 | T | C | 0.485 | 0.026  | 0.002 |
| rs3110609   | 17 | 48676181 | T | C | 0.658 | 0.015  | 0.002 |
| rs1801689   | 17 | 66214462 | A | C | 0.969 | -0.062 | 0.006 |
| rs77542162  | 17 | 69085137 | A | G | 0.978 | -0.128 | 0.007 |
| rs72853625  | 17 | 69209833 | G | A | 0.985 | 0.056  | 0.009 |
| rs77049332  | 17 | 69230009 | A | G | 0.947 | 0.029  | 0.005 |
| rs55714927  | 17 | 7176997  | C | T | 0.810 | 0.026  | 0.003 |
| rs3744263   | 17 | 7710390  | T | C | 0.362 | 0.013  | 0.002 |
| rs12948394  | 17 | 78386710 | C | T | 0.518 | 0.018  | 0.002 |
| rs77960347  | 18 | 49583585 | A | G | 0.987 | -0.071 | 0.009 |
| rs7241918   | 18 | 49634583 | G | T | 0.176 | -0.016 | 0.003 |
| rs183143244 | 19 | 10554345 | A | C | 0.976 | 0.045  | 0.007 |
| rs11668368  | 19 | 10609019 | G | T | 0.903 | -0.029 | 0.004 |
| rs10423733  | 19 | 11075243 | T | C | 0.820 | 0.103  | 0.003 |
| rs72981271  | 19 | 11154116 | C | T | 0.709 | -0.040 | 0.002 |
| rs8101801   | 19 | 11224801 | C | A | 0.964 | 0.045  | 0.006 |
| rs12986015  | 19 | 15693940 | C | T | 0.498 | -0.013 | 0.002 |
| rs62120394  | 19 | 18227899 | G | A | 0.708 | -0.016 | 0.002 |
| rs58542926  | 19 | 19268740 | C | T | 0.925 | 0.106  | 0.004 |
| rs188247550 | 19 | 19285807 | C | T | 0.987 | 0.121  | 0.010 |
| rs144984216 | 19 | 20369092 | C | T | 0.975 | 0.037  | 0.007 |
| rs56113850  | 19 | 40847202 | T | C | 0.423 | -0.013 | 0.002 |
| rs145130411 | 19 | 43485383 | T | G | 0.893 | 0.019  | 0.003 |
| rs187870654 | 19 | 43753872 | G | A | 0.988 | 0.062  | 0.010 |
| rs62119267  | 19 | 44631381 | A | C | 0.978 | 0.251  | 0.007 |
| rs62119282  | 19 | 44642317 | C | T | 0.938 | -0.033 | 0.004 |
| rs113330691 | 19 | 44792629 | G | A | 0.965 | 0.211  | 0.006 |
| rs148933445 | 19 | 44799247 | G | A | 0.978 | 0.438  | 0.008 |
| rs77196615  | 19 | 44877078 | T | C | 0.984 | -0.045 | 0.008 |
| rs72654437  | 19 | 44912842 | G | A | 0.970 | -0.054 | 0.007 |
| rs12691088  | 19 | 44915229 | G | A | 0.979 | -0.178 | 0.008 |
| rs138692741 | 19 | 44963875 | C | T | 0.964 | -0.059 | 0.006 |

|             |    |          |   |   |       |        |       |
|-------------|----|----------|---|---|-------|--------|-------|
| rs150262789 | 19 | 45933306 | C | T | 0.984 | 0.099  | 0.008 |
| rs516246    | 19 | 48702915 | C | T | 0.492 | -0.030 | 0.002 |
| rs35081008  | 19 | 58150868 | C | T | 0.852 | 0.032  | 0.003 |
| rs438568    | 20 | 12978039 | A | G | 0.391 | -0.013 | 0.002 |
| rs969075    | 20 | 17811678 | T | C | 0.335 | -0.012 | 0.002 |
| rs2618566   | 20 | 17864040 | G | T | 0.340 | 0.025  | 0.002 |
| rs6050463   | 20 | 25228354 | G | A | 0.507 | -0.013 | 0.002 |
| rs224424    | 20 | 35560231 | A | G | 0.788 | 0.021  | 0.003 |
| rs117113213 | 20 | 40537052 | G | A | 0.967 | -0.098 | 0.006 |
| rs1997833   | 20 | 41061702 | T | C | 0.700 | -0.022 | 0.002 |
| rs6065347   | 20 | 41393319 | T | C | 0.782 | -0.016 | 0.003 |
| rs1800961   | 20 | 44413724 | C | T | 0.969 | 0.060  | 0.006 |
| rs6073958   | 20 | 45923216 | T | C | 0.801 | -0.017 | 0.003 |
| rs73075609  | 20 | 5600143  | C | T | 0.973 | -0.037 | 0.007 |
| rs2256814   | 20 | 63742630 | G | A | 0.802 | -0.015 | 0.003 |
| rs6090101   | 20 | 64278167 | G | A | 0.802 | -0.018 | 0.003 |
| rs11911615  | 21 | 36180834 | T | G | 0.672 | 0.012  | 0.002 |
| rs4818025   | 21 | 39337245 | A | G | 0.428 | -0.014 | 0.002 |
| rs960596    | 22 | 40997516 | C | T | 0.661 | -0.013 | 0.002 |
| rs5770859   | 22 | 50435332 | A | G | 0.655 | -0.013 | 0.002 |

**Table Legend:** Genetic variants for LDLc obtained from a GWAS for lipid levels in Richardson TG *et al* PLoS Med 2020. Abbreviations: SNP, single nucleotide polymorphism; CHR, chromosome; BP, base position based on genome assembly GRCh38p12; EA, effect allele; NEA, Non-effect allele; EAF, effect allele frequency.



**Supplementary Table 2: Genetic variants used to proxy BMI.**

| SNP        | CHR | BP        | EA | NEA | EAF   | BETA   | SE    |
|------------|-----|-----------|----|-----|-------|--------|-------|
| rs11165643 | 1   | 96458541  | C  | T   | 0.425 | -0.022 | 0.003 |
| rs12401738 | 1   | 77981077  | A  | G   | 0.425 | 0.021  | 0.003 |
| rs12566985 | 1   | 74536509  | G  | A   | 0.425 | 0.024  | 0.003 |
| rs17024393 | 1   | 109612066 | C  | T   | 0.042 | 0.066  | 0.009 |
| rs2820292  | 1   | 201815159 | A  | C   | 0.492 | -0.020 | 0.003 |
| rs3101336  | 1   | 72285502  | T  | C   | 0.351 | -0.033 | 0.003 |
| rs543874   | 1   | 177920345 | G  | A   | 0.267 | 0.048  | 0.004 |
| rs657452   | 1   | 49124175  | A  | G   | 0.417 | 0.023  | 0.003 |
| rs1016287  | 2   | 59078490  | T  | C   | 0.325 | 0.023  | 0.003 |
| rs10182181 | 2   | 24927427  | A  | G   | 0.500 | -0.031 | 0.003 |
| rs11126666 | 2   | 26705943  | G  | A   | 0.692 | -0.021 | 0.003 |
| rs11688816 | 2   | 62825913  | A  | G   | 0.542 | -0.017 | 0.003 |
| rs12986742 | 2   | 58748008  | C  | T   | 0.500 | 0.021  | 0.004 |
| rs13021737 | 2   | 632348    | A  | G   | 0.125 | -0.060 | 0.004 |
| rs1528435  | 2   | 180686235 | T  | C   | 0.583 | 0.018  | 0.003 |
| rs2121279  | 2   | 142285716 | T  | C   | 0.117 | 0.025  | 0.004 |
| rs7599312  | 2   | 212548507 | G  | A   | 0.708 | 0.022  | 0.003 |
| rs13078960 | 3   | 85758440  | T  | G   | 0.817 | -0.030 | 0.004 |
| rs1516725  | 3   | 186106215 | T  | C   | 0.092 | -0.045 | 0.005 |
| rs16851483 | 3   | 141556594 | G  | T   | 0.908 | -0.048 | 0.008 |
| rs2365389  | 3   | 61250788  | C  | T   | 0.658 | 0.020  | 0.003 |
| rs3849570  | 3   | 81742961  | A  | C   | 0.367 | 0.019  | 0.003 |
| rs6804842  | 3   | 25064946  | A  | G   | 0.425 | -0.019 | 0.003 |
| rs10938397 | 4   | 45180510  | A  | G   | 0.567 | -0.040 | 0.003 |
| rs11727676 | 4   | 144737912 | C  | T   | 0.075 | -0.036 | 0.006 |
| rs13107325 | 4   | 102267552 | C  | T   | 0.883 | -0.048 | 0.007 |
| rs2112347  | 5   | 75719417  | G  | T   | 0.375 | -0.026 | 0.003 |
| rs13191362 | 6   | 162612318 | A  | G   | 0.800 | 0.028  | 0.005 |
| rs2033529  | 6   | 40380914  | G  | A   | 0.258 | 0.019  | 0.003 |
| rs205262   | 6   | 34595387  | A  | G   | 0.733 | -0.022 | 0.004 |
| rs2207139  | 6   | 50877777  | G  | A   | 0.100 | 0.045  | 0.004 |
| rs9400239  | 6   | 108656460 | C  | T   | 0.703 | 0.019  | 0.003 |
| rs1167827  | 7   | 75533848  | A  | G   | 0.458 | -0.020 | 0.003 |
| rs2245368  | 7   | 76978826  | T  | C   | 0.758 | -0.032 | 0.006 |
| rs17405819 | 8   | 75894349  | C  | T   | 0.367 | -0.022 | 0.003 |
| rs2033732  | 8   | 84167474  | C  | T   | 0.758 | 0.019  | 0.004 |
| rs10733682 | 9   | 126698635 | A  | G   | 0.425 | 0.017  | 0.003 |
| rs10968576 | 9   | 28414341  | G  | A   | 0.292 | 0.025  | 0.003 |
| rs1928295  | 9   | 117616205 | C  | T   | 0.425 | -0.019 | 0.003 |
| rs4740619  | 9   | 15634328  | T  | C   | 0.533 | 0.018  | 0.003 |

|            |    |           |   |   |       |        |       |
|------------|----|-----------|---|---|-------|--------|-------|
| rs6477694  | 9  | 109170062 | C | T | 0.358 | 0.017  | 0.003 |
| rs11191560 | 10 | 103109281 | T | C | 0.942 | -0.031 | 0.005 |
| rs17094222 | 10 | 100635683 | C | T | 0.208 | 0.025  | 0.004 |
| rs7899106  | 10 | 85651147  | A | G | 0.950 | -0.040 | 0.007 |
| rs7903146  | 10 | 112998590 | T | C | 0.250 | -0.023 | 0.003 |
| rs10840100 | 11 | 8647890   | G | A | 0.725 | 0.021  | 0.003 |
| rs11030104 | 11 | 27662970  | A | G | 0.800 | 0.041  | 0.004 |
| rs12286929 | 11 | 115151684 | G | A | 0.433 | 0.022  | 0.003 |
| rs2176598  | 11 | 43842728  | T | C | 0.200 | 0.020  | 0.004 |
| rs3817334  | 11 | 47629441  | C | T | 0.550 | -0.026 | 0.003 |
| rs11057405 | 12 | 122297350 | A | G | 0.092 | -0.031 | 0.006 |
| rs7138803  | 12 | 49853685  | G | A | 0.558 | -0.032 | 0.003 |
| rs12429545 | 13 | 53528071  | G | A | 0.900 | -0.033 | 0.005 |
| rs7992289  | 13 | 27462293  | A | G | 0.758 | -0.026 | 0.004 |
| rs10132280 | 14 | 25458973  | A | C | 0.333 | -0.023 | 0.003 |
| rs11847697 | 14 | 30045906  | T | C | 0.042 | 0.049  | 0.008 |
| rs12885454 | 14 | 29267632  | C | A | 0.633 | 0.021  | 0.003 |
| rs7141420  | 14 | 79433111  | T | C | 0.617 | 0.024  | 0.003 |
| rs16951275 | 15 | 67784830  | C | T | 0.225 | -0.031 | 0.004 |
| rs3736485  | 15 | 51456413  | A | G | 0.425 | 0.018  | 0.003 |
| rs12446632 | 16 | 19924067  | A | G | 0.133 | -0.040 | 0.005 |
| rs1421085  | 16 | 53767042  | C | T | 0.450 | 0.081  | 0.003 |
| rs3888190  | 16 | 28878165  | A | C | 0.358 | 0.031  | 0.003 |
| rs758747   | 16 | 3577357   | C | T | 0.733 | -0.023 | 0.004 |
| rs879620   | 16 | 3965728   | C | T | 0.408 | -0.024 | 0.004 |
| rs9925964  | 16 | 31118574  | G | A | 0.392 | -0.019 | 0.003 |
| rs1000940  | 17 | 5379957   | G | A | 0.225 | 0.019  | 0.003 |
| rs12940622 | 17 | 80641771  | A | G | 0.458 | -0.018 | 0.003 |
| rs17066856 | 18 | 60382423  | C | T | 0.133 | -0.040 | 0.006 |
| rs1808579  | 18 | 23524924  | T | C | 0.475 | -0.017 | 0.003 |
| rs6567160  | 18 | 60161902  | C | T | 0.283 | 0.056  | 0.004 |
| rs17724992 | 19 | 18344015  | A | G | 0.692 | 0.019  | 0.004 |
| rs2287019  | 19 | 45698914  | C | T | 0.850 | 0.036  | 0.004 |
| rs29941    | 19 | 33818627  | A | G | 0.333 | -0.018 | 0.003 |
| rs3810291  | 19 | 47065746  | A | G | 0.625 | 0.028  | 0.004 |

Table Legend: Genetic variants for BMI obtained from a GWAS for anthropometric measures in Locke AE *et al* Nature 2015.

Abbreviations: SNP, single nucleotide polymorphism; CHR, chromosome; BP, base position based on genome assembly GRCh38p12; EA, effect allele; NEA, Non-effect allele; EAF, effect allele frequency.

**Supplementary Table 3: Characteristics of participants included in individual-level MR analyses.**

|                                   | CARDIA          | CHS             | GESUS           | EPIC            | FamHS           | FHS            | HCHS/SOL     | JHS             | GeneSTAR     | MDC-CC          | MESA            | MGBB            | RS              | WGHS            |
|-----------------------------------|-----------------|-----------------|-----------------|-----------------|-----------------|----------------|--------------|-----------------|--------------|-----------------|-----------------|-----------------|-----------------|-----------------|
| Age, y                            | 54 (5)          | 72 (5)          | 55 (13)         | 50 (9)          | 55 (13)         | 58 (16)        | 46 (14)      | 61 (13)         | 49 (13)      | 57 (6)          | 69 (10)         | 62 (16)         | 64 (7)          | 55 (7)          |
| Gender, Female n (%)              | 1,012<br>(58.6) | 2,346<br>(61.3) | 3,946<br>(55.4) | 1,444<br>(62.3) | 1,369<br>(58.2) | 2895<br>(53.9) | 7,062 (59.7) | 1,862<br>(61.8) | 1,520 (57.7) | 2,880<br>(60.5) | 2,621<br>(52.6) | 7,312<br>(52.5) | 1,574<br>(59.5) | 23,294<br>(100) |
| BMI, kg/m <sup>2</sup>            | 29.8 (7.1)      | 26.6<br>(4.7)   | 26.6<br>(4.6)   | 26.1<br>(4.3)   | 28.7<br>(5.8)   | 27.9<br>(5.6)  | 29.7 (6.0)   | 32.2 (7.5)      | 30.5 (7.0)   | 25.6<br>(3.9)   | 28.1<br>(5.7)   | 28.4<br>(6.1)   | 27.2<br>(4.2)   | 25.9<br>(5.0)   |
| Fasting glucose, mmol/L           | 5.61 (1.56)     | 6.06<br>(1.88)  | N/A             | 5.78<br>(1.37)  | 5.42<br>(1.20)  | 5.59<br>(1.24) | 5.8 (2.0)    | 5.90<br>(2.03)  | 5.42 (1.75)  | 5.63<br>(0.79)  | 5.55<br>(1.53)  | N/A             | 5.77<br>(1.34)  | N/A             |
| Prevalence of dyslipidemia, n (%) | N/A             | 2,088<br>(54.5) | 2,234<br>(31.9) | 599<br>(25.9)   | 869<br>(36.9)   | 2653<br>(49.4) | 5,274 (44.6) | N/A             | 1,029 (39.3) | 3,184<br>(66.8) | 2,550<br>(51.2) | N/A             | 1313<br>(50.2)  | 6,961<br>(30.0) |
| Total cholesterol, mmol/L         | 4.94 (0.9)      | 5.49<br>(1.01)  | 5.49<br>(1.02)  | 5.30<br>(1.10)  | 4.93<br>(0.98)  | 4.80<br>(0.94) | 5.20 (1.11)  | 5.09<br>(1.07)  | 5.13 (1.07)  | 6.15<br>(1.08)  | 4.83<br>(0.97)  | 4.50<br>(1.12)  | 5.79<br>(0.98)  | 5.48<br>(1.08)  |
| LDL-cholesterol, mmol/L           | 2.90 (0.10)     | 3.36<br>(0.92)  | 3.14<br>(0.89)  | 3.15<br>(0.91)  | 2.93<br>(0.86)  | 2.64<br>(0.79) | 3.20 (0.93)  | 3.11<br>(0.96)  | 3.08 (0.98)  | 4.17<br>(0.99)  | 2.82<br>(0.85)  | 2.40<br>(0.90)  | 3.66<br>(0.9)   | 3.21<br>(0.88)  |
| HDL-cholesterol, mmol/L           | 1.51 (0.50)     | 1.44<br>(0.41)  | 1.57<br>(0.47)  | 1.45<br>(0.39)  | 1.28<br>(0.37)  | 1.56<br>(0.48) | 1.30 (0.31)  | 1.45<br>(0.42)  | 1.43 (0.44)  | 1.4<br>(0.37)   | 1.48<br>(0.44)  | 1.50<br>(0.50)  | 1.41<br>(0.44)  | 1.39<br>(0.39)  |
| Triglycerides, mmol/L             | 2.90 (1.00)     | 1.54<br>(0.83)  | 1.79<br>(1.22)  | 3.48<br>(2.51)  | 1.60<br>(1.02)  | 1.29<br>(0.84) | 1.64 (1.31)  | 1.19<br>(1.11)  | 1.36 (0.79)  | 1.30<br>(0.63)  | 1.27<br>(0.86)  | 1.42<br>(0.81)  | 1.53<br>(0.82)  | 3.72<br>(2.38)  |

Note: Values are mean (SD) for continuous variables; numbers and (percentages) for categorical variables.

Abbreviation: BMI, body mass index; LDLc low lipoprotein density cholesterol; HDLc, high lipoprotein density cholesterol.

Coronary Artery Risk Development in Young Adults (CARDIA), USA; Cardiovascular Health Study (CHS), USA; Danish General Suburban Population Study (GESUS), Denmark; European Prospective Investigation into Cancer and Nutrition-Potsdam (EPIC-Potsdam) study, Germany; Family Heart Study (FamHS), USA; Framingham Heart Study (FHS), USA; Hispanic Community Health Study / Study of Latinos (HCHS/SOL), USA; Jackson Heart Study (JHS), USA; Johns Hopkins Genetic Study of Atherosclerosis Risk (GeneSTAR), USA; Malmö Diet and Cancer-Cardiovascular Cohort study (MDC-CC), Sweden; Multi-Ethnic Study of Atherosclerosis (MESA), USA; Partners HealthCare Biobank (PHBB), USA; the Rotterdam Study (RS), The Netherlands; Women's Genome Health Study (WGHS), USA.

**Supplementary Table 4: Genetic variants used in the multivariable MR analysis to proxy LDLc and BMI.**

| SNP        | CHR | BP        | EA | NEA | EAF   |
|------------|-----|-----------|----|-----|-------|
| rs880315   | 1   | 10736809  | T  | C   | 0.660 |
| rs4970834  | 1   | 109272258 | C  | T   | 0.813 |
| rs4370783  | 1   | 109503258 | A  | C   | 0.886 |
| rs4661359  | 1   | 16186658  | C  | T   | 0.377 |
| rs543874   | 1   | 177920345 | A  | G   | 0.795 |
| rs1434282  | 1   | 199041592 | C  | T   | 0.275 |
| rs2820292  | 1   | 201815159 | A  | C   | 0.435 |
| rs2642438  | 1   | 220796686 | A  | G   | 0.297 |
| rs7517754  | 1   | 224356827 | A  | G   | 0.217 |
| rs556107   | 1   | 234717312 | C  | T   | 0.477 |
| rs16844296 | 1   | 234972561 | G  | A   | 0.788 |
| rs35589882 | 1   | 25480604  | T  | C   | 0.554 |
| rs657452   | 1   | 49124175  | A  | G   | 0.391 |
| rs11591147 | 1   | 55039974  | G  | T   | 0.983 |
| rs2495477  | 1   | 55052794  | A  | G   | 0.606 |
| rs11206517 | 1   | 55060755  | T  | G   | 0.967 |
| rs1168086  | 1   | 62646718  | A  | G   | 0.352 |
| rs3101336  | 1   | 72285502  | T  | C   | 0.396 |
| rs12566985 | 1   | 74536509  | G  | A   | 0.438 |
| rs12401738 | 1   | 77981077  | G  | A   | 0.622 |
| rs1556562  | 1   | 92568466  | G  | T   | 0.210 |
| rs11165643 | 1   | 96458541  | C  | T   | 0.410 |
| rs826681   | 2   | 108615619 | C  | T   | 0.857 |
| rs12464355 | 2   | 118092274 | A  | G   | 0.898 |
| rs17050272 | 2   | 120548864 | G  | A   | 0.591 |
| rs4954192  | 2   | 134875411 | C  | T   | 0.627 |
| rs2121279  | 2   | 142285716 | C  | T   | 0.875 |
| rs4556933  | 2   | 157587377 | G  | A   | 0.603 |
| rs2287622  | 2   | 168973818 | A  | G   | 0.397 |
| rs1528435  | 2   | 180686235 | C  | T   | 0.379 |
| rs11693335 | 2   | 20170652  | G  | A   | 0.523 |
| rs7569317  | 2   | 202663256 | T  | C   | 0.469 |
| rs13392272 | 2   | 20994618  | C  | T   | 0.497 |
| rs7567653  | 2   | 21054090  | G  | A   | 0.955 |
| rs7599312  | 2   | 212548507 | G  | A   | 0.733 |
| rs13396400 | 2   | 21279855  | A  | G   | 0.554 |
| rs1250229  | 2   | 215439661 | T  | C   | 0.261 |
| rs11568318 | 2   | 233756852 | C  | A   | 0.934 |
| rs10182181 | 2   | 24927427  | A  | G   | 0.514 |
| rs11126666 | 2   | 26705943  | G  | A   | 0.744 |

|            |   |           |   |   |       |
|------------|---|-----------|---|---|-------|
| rs1260326  | 2 | 27508073  | T | C | 0.396 |
| rs4850047  | 2 | 3587163   | T | C | 0.132 |
| rs745763   | 2 | 43228515  | T | C | 0.837 |
| rs4299376  | 2 | 43845437  | G | T | 0.323 |
| rs6709904  | 2 | 43853185  | A | G | 0.887 |
| rs12986742 | 2 | 58748008  | T | C | 0.524 |
| rs1016287  | 2 | 59078490  | T | C | 0.299 |
| rs4671050  | 2 | 62761034  | G | T | 0.684 |
| rs13021737 | 2 | 632348    | A | G | 0.172 |
| rs12471768 | 2 | 64701469  | T | C | 0.296 |
| rs3732359  | 3 | 119817582 | G | A | 0.220 |
| rs9289196  | 3 | 122549659 | T | C | 0.826 |
| rs13076933 | 3 | 12285932  | T | G | 0.741 |
| rs9883745  | 3 | 132513479 | G | A | 0.669 |
| rs6439629  | 3 | 136182428 | G | A | 0.728 |
| rs16851483 | 3 | 141556594 | G | T | 0.934 |
| rs4683438  | 3 | 142933717 | G | T | 0.666 |
| rs1516725  | 3 | 186106215 | T | C | 0.137 |
| rs6804842  | 3 | 25064946  | A | G | 0.426 |
| rs9834932  | 3 | 32493890  | A | G | 0.911 |
| rs11706420 | 3 | 58406684  | A | G | 0.917 |
| rs2365389  | 3 | 61250788  | C | T | 0.592 |
| rs9838601  | 3 | 69824633  | C | T | 0.354 |
| rs3849570  | 3 | 81742961  | C | A | 0.654 |
| rs13078960 | 3 | 85758440  | T | G | 0.798 |
| rs13107325 | 4 | 102267552 | C | T | 0.925 |
| rs11727676 | 4 | 144737912 | T | C | 0.904 |
| rs1842896  | 4 | 155590307 | G | T | 0.479 |
| rs6831256  | 4 | 3471412   | A | G | 0.577 |
| rs10938397 | 4 | 45180510  | A | G | 0.566 |
| rs2708699  | 4 | 68475319  | T | C | 0.593 |
| rs1458038  | 4 | 80243569  | C | T | 0.709 |
| rs7734476  | 5 | 123513182 | G | A | 0.450 |
| rs1003533  | 5 | 132419959 | C | T | 0.812 |
| rs6874202  | 5 | 156964617 | T | C | 0.366 |
| rs2936574  | 5 | 52826192  | T | G | 0.736 |
| rs9686661  | 5 | 56565959  | C | T | 0.799 |
| rs3010239  | 5 | 72714474  | G | A | 0.790 |
| rs12916    | 5 | 75360714  | T | C | 0.599 |
| rs17185536 | 6 | 100173055 | C | T | 0.754 |
| rs9400239  | 6 | 108656460 | T | C | 0.295 |
| rs3822855  | 6 | 115995719 | G | T | 0.598 |
| rs9491699  | 6 | 127150388 | C | T | 0.522 |

|            |   |           |   |   |       |
|------------|---|-----------|---|---|-------|
| rs12197047 | 6 | 130068066 | G | A | 0.330 |
| rs7776054  | 6 | 135097778 | A | G | 0.739 |
| rs2297359  | 6 | 160071581 | T | C | 0.984 |
| rs456598   | 6 | 160117889 | G | A | 0.859 |
| rs10455872 | 6 | 160589086 | A | G | 0.921 |
| rs6459450  | 6 | 16124329  | T | C | 0.693 |
| rs13191362 | 6 | 162612318 | A | G | 0.876 |
| rs1800562  | 6 | 26092913  | G | A | 0.923 |
| rs13217599 | 6 | 27618451  | T | C | 0.912 |
| rs3118362  | 6 | 28817308  | C | T | 0.095 |
| rs3115626  | 6 | 29854284  | C | T | 0.194 |
| rs2187980  | 6 | 30255736  | A | G | 0.856 |
| rs2229094  | 6 | 31572779  | T | C | 0.746 |
| rs6457614  | 6 | 32684123  | T | G | 0.880 |
| rs3800406  | 6 | 35165297  | A | G | 0.896 |
| rs913499   | 6 | 37070656  | A | G | 0.491 |
| rs2033529  | 6 | 40380914  | A | G | 0.712 |
| rs2296805  | 6 | 42961020  | T | G | 0.412 |
| rs2207139  | 6 | 50877777  | A | G | 0.831 |
| rs3757868  | 7 | 100885099 | G | A | 0.817 |
| rs2107448  | 7 | 21445484  | C | T | 0.410 |
| rs5008148  | 7 | 21564060  | A | G | 0.752 |
| rs4722551  | 7 | 25952206  | T | C | 0.841 |
| rs11772280 | 7 | 36146501  | C | T | 0.813 |
| rs2073547  | 7 | 44542732  | A | G | 0.816 |
| rs1167827  | 7 | 75533848  | A | G | 0.434 |
| rs2245368  | 7 | 76978826  | C | T | 0.169 |
| rs4148826  | 7 | 87445103  | T | C | 0.820 |
| rs12701220 | 7 | 983092    | T | C | 0.789 |
| rs10953259 | 7 | 98383795  | A | C | 0.184 |
| rs2737252  | 8 | 115651671 | G | A | 0.720 |
| rs2954021  | 8 | 125469835 | A | G | 0.495 |
| rs11997161 | 8 | 140728488 | T | C | 0.482 |
| rs11136343 | 8 | 143984818 | A | G | 0.616 |
| rs1495741  | 8 | 18415371  | G | A | 0.221 |
| rs9298506  | 8 | 54524964  | A | G | 0.792 |
| rs4738684  | 8 | 58480714  | A | G | 0.335 |
| rs17405819 | 8 | 75894349  | T | C | 0.702 |
| rs2033732  | 8 | 84167474  | T | C | 0.255 |
| rs9987289  | 8 | 9325848   | A | G | 0.091 |
| rs2066714  | 9 | 104824472 | T | C | 0.871 |
| rs11789603 | 9 | 104884738 | C | T | 0.892 |
| rs1883025  | 9 | 104902020 | C | T | 0.745 |

|            |    |           |   |   |       |
|------------|----|-----------|---|---|-------|
| rs6477694  | 9  | 109170062 | C | T | 0.352 |
| rs1928295  | 9  | 117616205 | T | C | 0.569 |
| rs10733682 | 9  | 126698635 | A | G | 0.473 |
| rs9697210  | 9  | 128706461 | G | A | 0.854 |
| rs507666   | 9  | 133273983 | G | A | 0.815 |
| rs10448340 | 9  | 136425617 | T | G | 0.680 |
| rs4740619  | 9  | 15634328  | T | C | 0.551 |
| rs6475606  | 9  | 22081851  | C | T | 0.516 |
| rs3780181  | 9  | 2640759   | A | G | 0.932 |
| rs10968576 | 9  | 28414341  | A | G | 0.678 |
| rs10869595 | 9  | 75598309  | G | A | 0.596 |
| rs17094222 | 10 | 100635683 | T | C | 0.786 |
| rs11191560 | 10 | 103109281 | T | C | 0.923 |
| rs2250802  | 10 | 112161596 | G | A | 0.276 |
| rs4132670  | 10 | 113008012 | G | A | 0.687 |
| rs1106056  | 10 | 122953445 | A | G | 0.896 |
| rs1277763  | 10 | 18206956  | T | C | 0.204 |
| rs17496403 | 10 | 50591054  | T | C | 0.801 |
| rs7077256  | 10 | 63576425  | A | G | 0.527 |
| rs16926246 | 10 | 69333636  | C | T | 0.870 |
| rs7899106  | 10 | 85651147  | A | G | 0.950 |
| rs2068888  | 10 | 93079885  | G | A | 0.549 |
| rs10791660 | 11 | 104000311 | C | A | 0.815 |
| rs12286929 | 11 | 115151684 | A | G | 0.473 |
| rs3741298  | 11 | 116786845 | C | T | 0.192 |
| rs7112937  | 11 | 117009740 | T | C | 0.911 |
| rs6589939  | 11 | 122647817 | A | G | 0.622 |
| rs624259   | 11 | 126317973 | G | A | 0.554 |
| rs4937122  | 11 | 126358764 | T | G | 0.925 |
| rs10128711 | 11 | 18611437  | T | C | 0.261 |
| rs11030104 | 11 | 27662970  | A | G | 0.797 |
| rs2176598  | 11 | 43842728  | T | C | 0.247 |
| rs3817334  | 11 | 47629441  | C | T | 0.592 |
| rs11601507 | 11 | 5679844   | C | A | 0.931 |
| rs174583   | 11 | 61842278  | C | T | 0.646 |
| rs11227247 | 11 | 65655382  | A | C | 0.865 |
| rs3819247  | 11 | 66526308  | T | C | 0.761 |
| rs10840100 | 11 | 8647890   | A | G | 0.346 |
| rs3184504  | 12 | 111446804 | T | C | 0.483 |
| rs11066320 | 12 | 112468611 | A | G | 0.425 |
| rs11065385 | 12 | 120985583 | A | G | 0.309 |
| rs11057405 | 12 | 122297350 | G | A | 0.895 |
| rs11057397 | 12 | 123935181 | C | T | 0.663 |

|            |    |           |   |   |       |
|------------|----|-----------|---|---|-------|
| rs11057830 | 12 | 124822507 | G | A | 0.859 |
| rs1007938  | 12 | 26649616  | A | G | 0.595 |
| rs7138803  | 12 | 49853685  | G | A | 0.631 |
| rs10876044 | 12 | 50512622  | C | T | 0.361 |
| rs1805738  | 12 | 8924734   | A | G | 0.774 |
| rs9521732  | 13 | 110381474 | C | A | 0.617 |
| rs6602909  | 13 | 113849020 | T | C | 0.672 |
| rs7992289  | 13 | 27462293  | G | A | 0.206 |
| rs7330025  | 13 | 32394470  | A | G | 0.477 |
| rs9316496  | 13 | 50467744  | G | A | 0.827 |
| rs12429545 | 13 | 53528071  | G | A | 0.871 |
| rs6573778  | 14 | 24403003  | T | C | 0.481 |
| rs10132280 | 14 | 25458973  | C | A | 0.699 |
| rs12885454 | 14 | 29267632  | C | A | 0.645 |
| rs11847697 | 14 | 30045906  | C | T | 0.956 |
| rs17101394 | 14 | 63765668  | G | A | 0.840 |
| rs6573971  | 14 | 70544752  | G | A | 0.445 |
| rs8022782  | 14 | 72975314  | C | T | 0.914 |
| rs12431412 | 14 | 74753392  | G | A | 0.553 |
| rs7141420  | 14 | 79433111  | C | T | 0.483 |
| rs1395901  | 15 | 49557477  | C | T | 0.635 |
| rs3736485  | 15 | 51456413  | A | G | 0.461 |
| rs3803452  | 15 | 57287548  | T | C | 0.938 |
| rs1532085  | 15 | 58391167  | A | G | 0.386 |
| rs261332   | 15 | 58435126  | A | G | 0.210 |
| rs2937856  | 15 | 63077543  | G | A | 0.139 |
| rs10152515 | 15 | 63778180  | C | A | 0.696 |
| rs16951275 | 15 | 67784830  | T | C | 0.773 |
| rs6495122  | 15 | 74833304  | A | C | 0.409 |
| rs12445804 | 16 | 11612244  | G | A | 0.925 |
| rs12446632 | 16 | 19924067  | G | A | 0.858 |
| rs3888190  | 16 | 28878165  | C | A | 0.601 |
| rs9925964  | 16 | 31118574  | A | G | 0.640 |
| rs758747   | 16 | 3577357   | C | T | 0.722 |
| rs879620   | 16 | 3965728   | C | T | 0.387 |
| rs1421085  | 16 | 53767042  | T | C | 0.597 |
| rs3764261  | 16 | 56959412  | C | A | 0.676 |
| rs4788547  | 16 | 71600641  | G | A | 0.627 |
| rs2000999  | 16 | 72074194  | G | A | 0.810 |
| rs7202323  | 16 | 72183214  | T | G | 0.770 |
| rs4782863  | 16 | 83948855  | A | G | 0.360 |
| rs1552657  | 16 | 86391091  | G | A | 0.554 |
| rs12447718 | 16 | 88503726  | G | A | 0.958 |



|            |    |          |   |   |       |
|------------|----|----------|---|---|-------|
| rs704      | 17 | 28367840 | G | A | 0.524 |
| rs548731   | 17 | 29555040 | C | T | 0.855 |
| rs12603885 | 17 | 31139704 | G | A | 0.300 |
| rs11870935 | 17 | 47655239 | G | A | 0.485 |
| rs3110609  | 17 | 48676181 | T | C | 0.658 |
| rs1000940  | 17 | 5379957  | A | G | 0.698 |
| rs1801689  | 17 | 66214462 | A | C | 0.969 |
| rs2886232  | 17 | 69154035 | T | C | 0.123 |
| rs3826408  | 17 | 7197973  | C | T | 0.543 |
| rs4366775  | 17 | 78385998 | C | T | 0.501 |
| rs12940622 | 17 | 80641771 | G | A | 0.560 |
| rs1808579  | 18 | 23524924 | C | T | 0.518 |
| rs7241918  | 18 | 49634583 | G | T | 0.176 |
| rs6567160  | 18 | 60161902 | T | C | 0.767 |
| rs17066856 | 18 | 60382423 | T | C | 0.908 |
| rs892078   | 19 | 10612343 | T | G | 0.903 |
| rs9305020  | 19 | 11076035 | T | C | 0.819 |
| rs4804576  | 19 | 11220678 | G | T | 0.965 |
| rs626223   | 19 | 15691876 | C | T | 0.477 |
| rs2302209  | 19 | 18213519 | C | T | 0.711 |
| rs17724992 | 19 | 18344015 | A | G | 0.732 |
| rs10401969 | 19 | 19296909 | T | C | 0.924 |
| rs29941    | 19 | 33818627 | A | G | 0.326 |
| rs2854496  | 19 | 43564041 | C | T | 0.813 |
| rs2965157  | 19 | 44673068 | T | C | 0.970 |
| rs3208856  | 19 | 44793549 | C | T | 0.965 |
| rs10402271 | 19 | 44825957 | T | G | 0.677 |
| rs8108762  | 19 | 45149969 | G | A | 0.681 |
| rs34851490 | 19 | 45881296 | A | G | 0.883 |
| rs3810291  | 19 | 47065746 | G | A | 0.325 |
| rs516246   | 19 | 48702915 | C | T | 0.492 |
| rs12981684 | 19 | 58120777 | A | G | 0.779 |
| rs438568   | 20 | 12978039 | A | G | 0.391 |
| rs1977107  | 20 | 17863180 | T | C | 0.173 |
| rs8115257  | 20 | 25227295 | A | G | 0.507 |
| rs224424   | 20 | 35560231 | A | G | 0.788 |
| rs4810296  | 20 | 40563677 | C | T | 0.612 |
| rs17820943 | 20 | 40639876 | C | T | 0.595 |
| rs6016534  | 20 | 41250316 | C | T | 0.520 |
| rs1800961  | 20 | 44413724 | C | T | 0.969 |
| rs6065906  | 20 | 45925376 | T | C | 0.814 |
| rs3208008  | 20 | 63694757 | A | C | 0.250 |
| rs1060347  | 20 | 64276168 | G | T | 0.798 |

|           |    |          |   |   |       |
|-----------|----|----------|---|---|-------|
| rs2835299 | 21 | 36180950 | C | T | 0.672 |
| rs2836986 | 21 | 39330210 | A | C | 0.429 |
| rs138352  | 22 | 40872921 | T | G | 0.341 |
| rs5770859 | 22 | 50435332 | A | G | 0.655 |

Note: Genetic variants from the univariable analysis were used again after undertaking further LD clumping to account for correlation between LDLc and BMI genetic instruments (LD cutoff of  $r^2 < 0.001$  within a 1Mb clumping window). Abbreviations: SNP, single nucleotide polymorphism; CHR, chromosome; BP, base position based on genome assembly GRCh38p12; EA, effect allele; NEA, Non-effect allele; EAF, effect allele frequency.

**Supplementary Table 5: Mendelian randomization estimates in sensitivity analyses.**

| Exposure (# SNPs) | Outcome | Sensitivity analysis                          | Odds ratio or Beta [95% CI] | P value |
|-------------------|---------|-----------------------------------------------|-----------------------------|---------|
| LDLc (232)        | T2D     | Weighted median                               | 1.18 [1.05-1.33]            | 0.006   |
|                   |         | MR Egger                                      | 1.18 [1.01-1.39]            | 0.039   |
|                   |         | MR-PRESSO*                                    | 1.14 [1.04-1.21]            | 0.004   |
|                   |         | <i>FTO</i> exclusion                          | 1.10 [1.00-1.21]            | 0.044   |
|                   |         | MVMR adjusting for HDL-c and TG <sup>\$</sup> | 1.18 [1.05-1.33]            | 0.005   |
| LDLc (195)        | BMI     | Weighted median                               | 0.05 [0.01-0.08]            | 0.010   |
|                   |         | MR Egger                                      | 0.02 [-0.07-0.10]           | 0.710   |
|                   |         | MR-PRESSO**                                   | 0.06 [0.03-0.09]            | <0.001  |
|                   |         | <i>FTO</i> exclusion                          | 0.05 [0.02-0.09]            | 0.002   |
|                   |         | MVMR adjusting for HDL-c and TG <sup>\$</sup> | 0.07 [0.02-0.11]            | 0.006   |

Note: Estimates reflect the effect of a 1-SD reduction in genetically predicted LDLc on the respective outcomes. BMI: body mass index; CI: confidence interval; LDLc: low-density lipoprotein cholesterol; MR: Mendelian randomization; T2D: type 2 diabetes; MVMR, Multivariable MR. These analyses included 227<sup>\*</sup>, 223<sup>\*\*</sup>, 827<sup>\$</sup>, and 692<sup>\$</sup> genetic instruments, respectively.

**Supplementary Table 6: Sensitivity analysis to investigate potential causal reversal effects on MR estimates.**

| <b>Exposure (# SNPs)</b> | <b>Outcome</b> | <b>Mediation contribution</b> | <b>Odds ratio or Beta [95% CI]</b> | <b>P value</b> |
|--------------------------|----------------|-------------------------------|------------------------------------|----------------|
| LDLc (223) <sup>#</sup>  | T2D            | Total effect                  | 1.11 [1.02-1.21]                   | 0.017          |
| LDLc (192) <sup>\$</sup> | BMI            | Indirect effect               | 1.05 [1.02-1.08]                   | 0.002          |
| BMI (73) <sup>%</sup>    | T2D            | Indirect effect               | 2.31 [1.96-2.74]                   | <0.001         |
|                          |                | Indirect effect               | 1.04 [1.01-1.07]                   | 0.003          |

Note: MR-Steiger was used to identify and filter out genetic instruments that explained more of the variance in the outcome trait than in the exposure. The number of filtered variants were 9<sup>#</sup>, 3<sup>\$</sup>, and 2<sup>%</sup>, respectively. Estimates reflect the effect of a 1-SD change in genetically driven exposures on outcomes. The indirect effect of LDLc on T2D was calculated using the product method (methods). The proportion mediated was 39% of the total effect (p=0.003).

**Supplementary Figure 1: Association of LDLc lowering genetic variants at LDLc drug targets with T2D and BMI.**

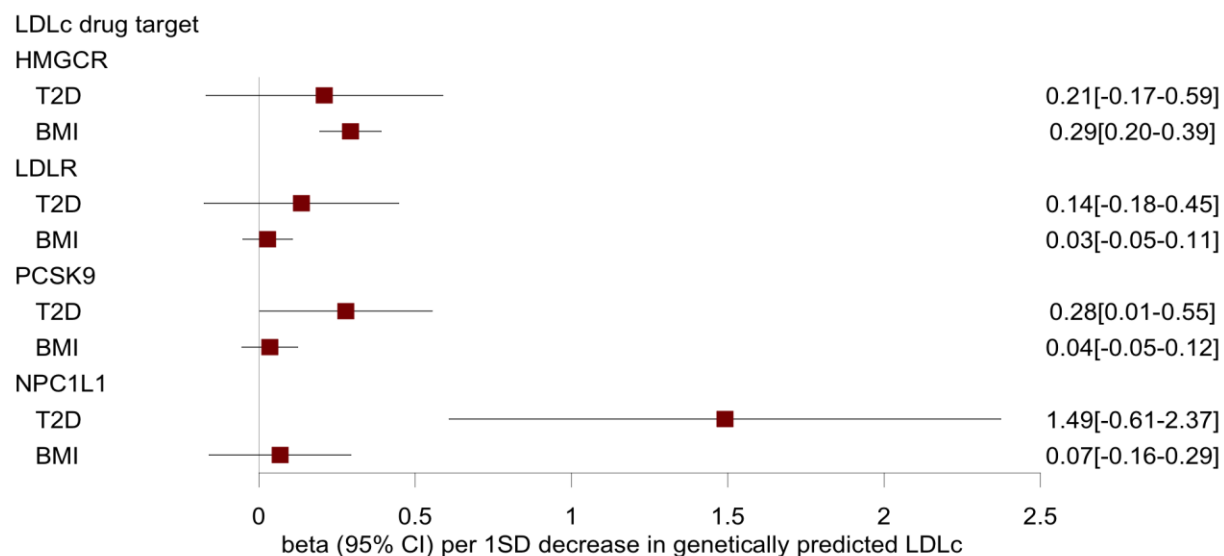

Note: MR estimates for 1SD decrease in genetically predicted LDLc on T2D and BMI based on genetic variation for LDLc drug targets. Instrument selection for LDLc drug targets was based on all genome-wide significant variants within 100kb on either side of each gene (*HMGCR*, *LDLR*, *PCSK9*, *NPC1L1*) and that were in a pair-wise LD cutoff of  $r^2 < 0.001$  within a 1Mb clumping window. Variants included were rs12916 at *HMGCR*; rs10423733, rs72981271, and rs8101801 at *LDLR*; rs11206517, rs11591147, and rs472495 at *PCSK9*; and rs2073547 at *NPC1L1*. T2D data are from 26,676 T2D cases and 132,532 controls from the DIAGRAM consortium. BMI data are from 322,154 participants from the GIANT consortium. All results are scaled to represent the odds ratio or beta coefficient per 1-SD genetically predicted reduction in LDLc.

**Supplementary Figure 2: Effect of a genetically predicted low LDLc on T2D odds in individual-level MR analyses.**

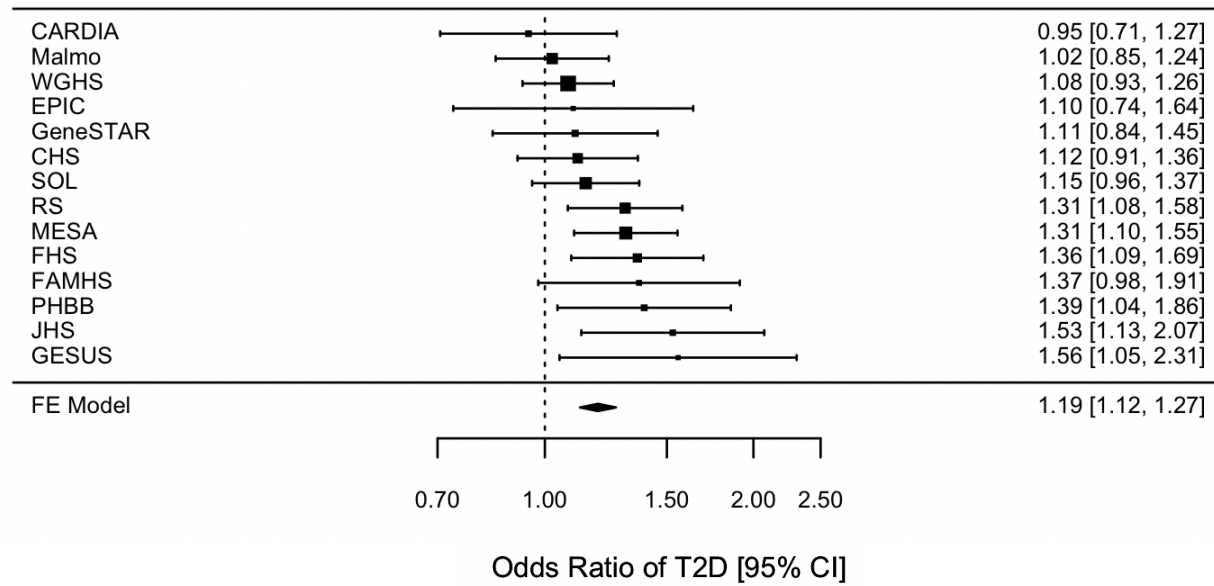

Note: Forest plot of MR estimates from individual-level data analyses for the combined effect of 1SD decrease in genetically predicted LDLc on T2D odds (black diamond) using fixed-effects inverse-variance weighted meta-analysis. Also, shown for each cohort the estimate of the association and the 95% confidence interval of the estimate.

**Supplementary Figure 3: Effect of a genetically predicted low LDLc on BMI in individual-level MR analyses.**

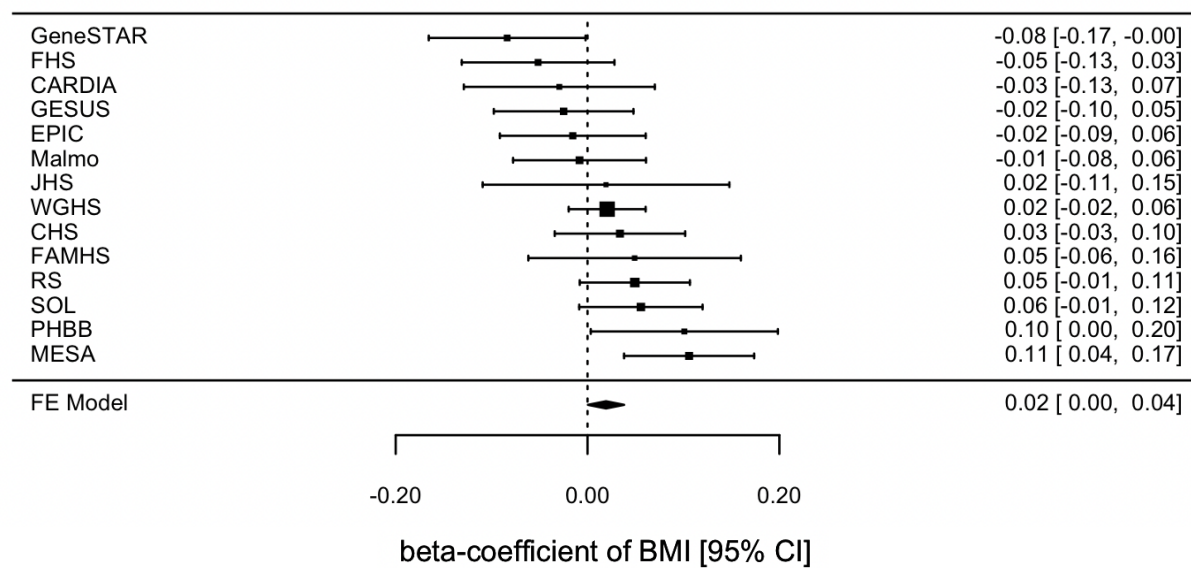

Note: Forest plot of MR estimates from individual-level data analyses for the combined effect of 1SD decrease in genetically predicted LDLc on BMI (black diamond) using fixed-effects inverse-variance weighted meta-analysis. Also, shown for each cohort the estimate of the association and the 95% confidence interval of the estimate.

**Supplementary Figure 4: Effect of a genetically predicted BMI on T2D odds in individual-level MR analyses.**

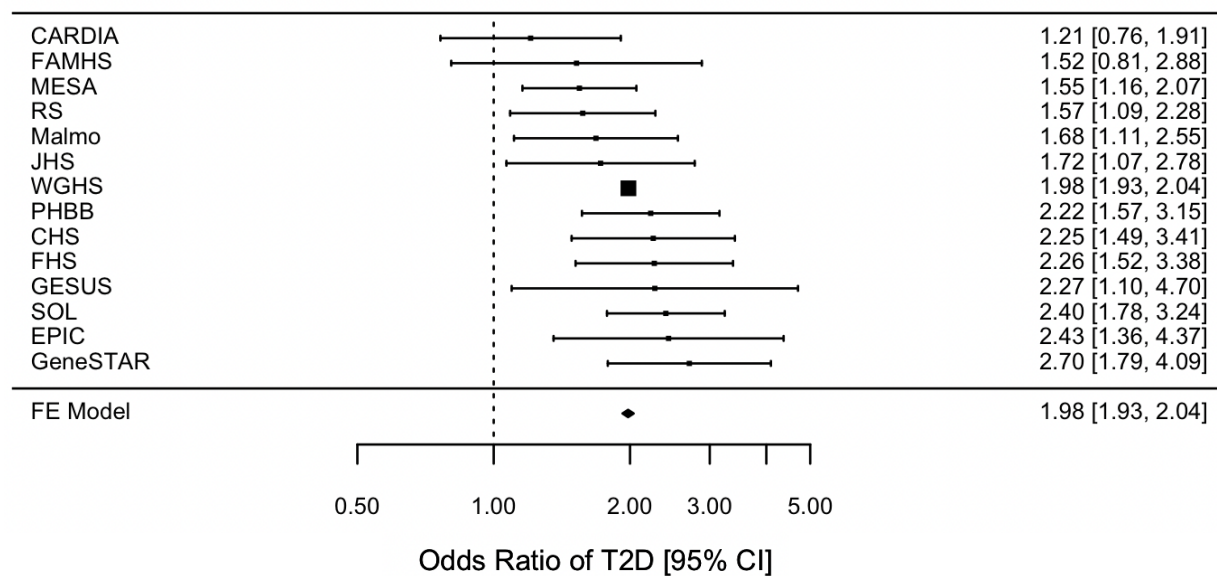

Note: Forest plot of MR estimates from individual-level data analyses for the combined effect of 1SD in genetically predicted BMI on T2D odds (black diamond) using fixed-effects inverse-variance weighted meta-analysis. Also, shown for each cohort the estimate of the association and the 95% confidence interval of the estimate.



## Appendix 1

### Description of the participating cohorts and exposure and outcome ascertainment

Participants for the current individual-level data MR study were drawn from 14 cohort studies, including the Coronary Artery Risk Development in Young Adults (CARDIA), the Cardiovascular Health Study (CHS), the Danish General Suburban Population Study (GESUS), the European Prospective Investigation into Cancer and Nutrition-Potsdam (EPIC-Potsdam) study, the Family Heart Study (FamHS), the Framingham Heart Study (FHS), the Hispanic Community Health Study / Study of Latinos (HCHS/SOL), the Jackson Heart Study (JHS), the Johns Hopkins Genetic Study of Atherosclerosis Risk (GeneSTAR), the Malmö Diet and Cancer-Cardiovascular Cohort study (MDC-CC), the Multi-Ethnic Study of Atherosclerosis (MESA), the Partners HealthCare Biobank (PHBB), the Rotterdam Study (RS) and the Women's Genome Health Study (WGHS).

The **Coronary Artery Risk Development in Young Adults (CARDIA)** study is a study examining the development and determinants of clinical and subclinical cardiovascular disease and its risk factors. It began in 1985 with a group of 5,115 black and white men and women aged 18-30 years, recruited from four communities in the USA, with follow-up visits every 2–5 years for approximately 30 years.

For these analyses we included 1,717 participants (253 T2D cases) with available genome-wide genetic data. LDLc was calculated using the Friedewald equation, and BMI was computed using weight and height determinations obtained at regular clinical visits. T2D was ascertained based on a) use of diabetes medication (assessed at every visit); b) a fasting blood glucose level of  $\geq 6.99$  mmol/l (126 mg/dl) (measured at visits in 1992, 1995, 2000, 2005); c) 2 h post-challenge glucose  $\geq 11.1$  mmol/l (200 mg/dl) (performed at the 1995 and 2005 visits); and/or d) a HbA1c  $\geq 6.5\%$  (48 mmol/mol) (assessed at the 2005 visit).

The **Cardiovascular Health Study (CHS)** is a population-based prospective cohort study of cardiovascular disease in adults older than 65 years and includes 5,888 participants  $\geq 65$  years of age identified from four U.S. communities using Medicare eligibility lists (Forsyth County, NC; Sacramento County, CA; Washington County, MD; Pittsburgh, PA). The original cohort included 5,201 participants recruited in 1989–1990 and 687 additional subjects were recruited in 1992–1993 to enhance the racial/ethnic diversity of the cohort.

For these analyses, we included 4,276 (448 prevalent T2D cases) individuals free of cardiovascular disease. LDLc was calculated using the Friedewald equation after excluding individuals with triglycerides  $> 400$  mg/dl. Weight and height were used to calculate BMI. Participants were classified as having T2D based on medication with oral hypoglycemic therapy or insulin or having fasting glucose level  $\geq 7.0$  mmol/L.

The **Danish General Suburban Population Study (GESUS)**. The cohort included 21,205 Danish participants (20-100 years) between 2010-2013 in Naestved Municipality located approximately 70km south of Copenhagen. Participants in the study completed a general questionnaire and a health examination including a non-fasting blood sample. In this study, we included 7120 participants (321 T2D cases) who were genotyped using the Infinium Global Screening Array v2 (Illumina). In the questionnaire, participants reported diabetes medication. Body mass index (BMI) was calculated as measured weight(kg) divided by measured height(meter) squared. From lithium-heparin plasma, nonfasting total cholesterol, high-density lipoprotein (HDL) cholesterol, triglycerides, and blood glucose(mmol/L) were measured at health examination on Cobas. Low-density lipoprotein (LDL) cholesterol was calculated using Friedewald equation among participants with triglycerides  $\leq 4.0$  mmol/L. From whole blood EDTA, HbA1c was measured on Tosoh Automated Glycohemoglobin Analyzer HLC-723G8 (Tosoh Corporation) (an automated high-pressure liquid chromatography instrument). Participants were classified as having T2D based on self-reported diabetes (with onset after 30-years old), medication with oral hypoglycemic therapy, nonfasting glucose level  $\geq 11.1$  mmol/L, or HbA1c  $> 48$  mmol/mol.

The **European Prospective Investigation into Cancer and Nutrition-Potsdam** (EPIC-Potsdam) study consists of 27,548 participants recruited between 1994 and 1998 from the general population in Potsdam and surroundings, Germany. The baseline examination involved a personal interview including questions on prevalent diseases, self-administered questionnaires, interviewer-conducted anthropometric measurements and a blood sample collection.

A random sub-cohort of 2,500 individuals was randomly selected from 26,444 participants who provided blood samples at baseline. Of these, participants with prevalent myocardial infarction or stroke were excluded. Further exclusion criteria were missing genetic data and missing lipid measurements, leaving 2,316 (93 prevalent T2D cases) individuals for analyses in the sub-cohort. LDLc was calculated using the Friedewald equation and BMI was computed using weight and height measured by trained interviewers. Prevalent type 2 diabetes at baseline was evaluated by a physician with information from self-reported diabetes diagnosis and/or diabetes medication at baseline. All participants provided written informed consent. The EPIC-Potsdam study was approved by the ethics committee of the State of Brandenburg, Germany. All procedures were in accordance with the ethical standards of the institutional and/or national research committee and with the 1964 Helsinki declaration and its later amendments or comparable ethical standards.

The **Family Heart Study** (FamHS) is a multicenter, population-based study of genetic and nongenetic determinants of coronary heart disease, atherosclerosis, and cardiovascular risk factors. The study began in 1992 with the ascertainment of 1,200 families, half randomly sampled, and half selected because of an excess of coronary heart disease or risk factor abnormalities. A broad range of phenotypes were assessed at a clinic examination including height, weight, blood lipids and cardiovascular risk factors. Approximately 8 years later, study participants belonging to the largest pedigrees were invited for a second clinical exam, and a total of 2,756 Caucasian participants were examined.

All 2,756 participants consented for genetic studies and have genome-wide genetic data. We included 2,353 participants (n=256 T2D cases) for these analyses. LDLc was calculated using the Friedewald equation after excluding individuals with triglycerides > 400mg/dl. T2D was defined by a fasting glucose  $\geq$  126 mg/dl or taking diabetes medications, self-report of T2D, or having doctor diagnosis of T2D. An age of onset  $\geq$  40 years was also required to diagnose T2D.

The **Framingham Heart Study** (FHS) is a community-based longitudinal study designed to examine CVD risk in the offspring of the Original Cohort participants of the Framingham Heart Study and their spouses. In 1971, 5,124 individuals were enrolled; since then, the Offspring Cohort has been examined every 3–4 y. between 1998 and 2001, during the 7th examination cycle, 3,539 adults, with a mean age of 61y, underwent a standardized medical history and physical examination. Beginning in 2002, 4,095 Gen III participants, who had at least one parent in the offspring cohort, were enrolled in the Framingham Heart Study. At the first cycle of the Gen III study, 4,095 individuals with a mean age of 40 y, underwent the standard clinic examination. For the present study both cohorts were combined for the analysis.

A total of 5,368 adults with available DNA and consent to share genetic data were eligible for the current study. LDLc concentrations were estimated using the Friedewald formula. Participants with serum triglycerides above 400 mg/dL were excluded from the analyses. BMI was computed using weight and height determinations obtained at regular clinical visits. Diabetes was defined as a fasting plasma glucose  $\geq$  7.0 mmol/L, non-fasting glucose > 11.1 mmol/L, hba1c > 6.5, or treatment with either insulin or a hypoglycemic medication. Chart review was conducted to identify participants with type 1 diabetes mellitus; those individuals were excluded from the analyses.

The **Hispanic Community Health Study / Study of Latinos** (HCHS/SOL) is a multi-center epidemiologic study in Hispanic/Latino populations established in 2006 to assess the role of acculturation in the prevalence and development of disease. The target population of 16,000 persons of Hispanic/Latino origin, specifically Cuban, Puerto Rican, Dominican, Mexican, and Central/South American, were recruited through four Field Centers in Miami, San Diego, Chicago and the Bronx area of New York. During 2008-2011 study participants aged 18-74 years underwent an extensive clinic exam and assessments. During the 2014-2017 second clinic visit participants were re-examined to again collect data predictive of various health outcomes of interest.

For this analysis we included 11,822 out of the ~13,000 participants with available genome-wide genetic data who did not have cardiovascular disease at baseline. In HCSS/SOL, LDLc was quantified using the Friedewald equation. BMI was computed from weight and height measured at the clinic visit. T2D was defined according to the American Diabetes Association criteria which includes fasting glucose levels  $\geq 126$  mg/dL; or fasting  $\leq 8$  hours and fasting glucose  $\geq 200$  mg/dL; or post-oral glucose tolerance test (OGTT) glucose  $\geq 200$  mg/dL; or hemoglobin A1C (HbA1C)  $\geq 6.5\%$ ; or if on current treatment with a hypoglycemic agent.

The **Jackson Heart Study (JHS)**, is community-based epidemiologic investigation of environmental and genetic factors associated with cardiovascular disease among African Americans, recruiting 5,306 men and women  $\geq 21$  years of age from the Jackson, Mississippi metropolitan area (Hinds, Madison, and Rankin counties). The baseline exam was conducted from 2000 – 2004, with Exam 2 conducted from 2005 - 2008 and Exam 3 conducted from 2009 – 2013, with a 4<sup>th</sup> exam ongoing (data for this study was drawn from Exams 1-3). All participants included in this analysis provided written, informed consent for use of genetic data, and all study protocols conform to the 1975 Declaration of Helsinki guidelines. The study was approved by the Institutional Review Boards of the participating institutions (University of Mississippi Medical Center, Jackson State University and Tougaloo College).

For this analysis we included 2,992 participants with post-quality control GWAS data from Affymetrix 6.0 array (imputed to 1000G phase 3 v5 on the Michigan imputation server) and relevant phenotype data. Lipid profiles were assessed at the University of Minnesota as previously described; LDL was calculated using the Friedewald equation, with those with triglycerides  $> 400$  mg/dL excluded. Prevalent diabetes was defined according to the American Diabetes Association (ADA) criteria as fasting glucose  $\geq 126$  mg/dL, HbA1c  $\geq 6.5\%$ , or self-reported use of a diabetes medication within 2 weeks prior to the clinic visit. BMI was calculated in kg/m<sup>2</sup> from height to the nearest centimeter and weight to the nearest .1 kilogram in light clothing and in stocking feet. LDL, BMI, and diabetes were assessed at Exams 1-3 in individuals participating in each exam.

The **Johns Hopkins Genetic Study of Atherosclerosis (GeneSTAR)** is an ongoing prospective family study that begun in 1983 to explore the causes of premature cardiovascular disease. Briefly, probands with a premature coronary disease event prior to 60 years of age were identified at the time of hospitalization in any of 10 Baltimore area hospitals. Their apparently healthy 30–59-year-old siblings without known coronary artery disease were initially recruited and screened between 1983 and 2006; offspring of the siblings and probands, as well as the co-parent of these offspring, were recruited and assessed between 2003 and 2006.

In this study, 2,526 European- and African American participants with available genome-wide genetic data who did not have cardiovascular disease were included. LDLc was estimated using the Friedewald formula for participants with triglycerides  $< 400$  mg/dl. BMI was calculated from height and weight measured at the clinical screening visit. T2D was defined as fasting glucose levels  $\geq 126$  mg/dl, current hypoglycemic treatment, and/or self-reported history at clinical screening visit.

The **Malmö Diet and Cancer-Cardiovascular Cohort study (MDC-CC)** consists of individuals randomly (50%) invited to be involved in additional baseline examinations between 1991 and 1994. In total 6,103 individuals (46-68 y, 58% females) participated in the additional examinations.

For this analysis, we included 4,764 individuals for whom data on genotype were available. Levels of LDL-C were calculated according to Friedewald's formula, with the assignment of missing values to subjects with a triglyceride level of more than 4.5 mmol/L. BMI was calculated in kg/m<sup>2</sup> from height and weight obtained at clinical exams. T2D cases were defined as individuals with fasting plasma glucose  $\geq 7.0$  mmol/L, glucose  $\geq 11.0$  mmol/L 2-h after OGTT, under diabetes medication (A10 drugs), or who have reported having diabetes in a questionnaire were identified as incident diabetes cases. In addition, T2D cases were identified via at least one of seven registries or at examinations during follow-up. Cases were also identified via registries from the National Board of Health and Welfare: The Swedish National Inpatient Registry, the Swedish Hospital-based outpatient care, the Cause-of-death Registry and the Swedish Prescribed Drug Registry.

The **Mass General Brigham Biobank** (MGBB) is a hospital-based cohort including data from 30,000 ethnically diverse consented patients seen at Partners HealthCare hospitals. Patients were recruited in the context of clinical care appointments at more than 40 sites and clinics. Biobank subjects provide consent for the use of their samples and data in broad-based research. A total of 15,061 individuals had available genomic data.

For this analysis, we included 13,925 individuals with available genome-wide genetic data and exposure and outcome information. LDLc was determined directly or calculated using the Friedewald equation. BMI was calculated from weight and height obtained during the clinical visits. T2D status was defined based on “curated phenotypes” developed by the Biobank Portal team using both structured and unstructured electronic medical record data and clinical, computational, and statistical methods.

The **Multi-Ethnic Study of Atherosclerosis** (MESA) is a study of the characteristics of subclinical cardiovascular disease (disease detected non-invasively before it has produced clinical signs and symptoms) and the risk factors that predict progression to clinically overt cardiovascular disease or progression of the subclinical disease. MESA includes a diverse, population-based sample of 6,814 asymptomatic individuals of European- African- Hispanic- and Chinese American ancestry ascertained across six field centers across the United States.

The sample included in this study was composed of those 4,912 individuals with available genome-wide genetic data and no history of cardiovascular events. LDLc was calculated using the Friedewald equation. In MESA, incident diabetes was defined as a fasting plasma glucose  $\geq 7.0$ mmol/L or treatment with either insulin or a hypoglycemic medication.

The **Rotterdam Study** is a prospective population-based cohort study in Ommoord, a suburb of Rotterdam, designed to investigate the prevalence and incidence of and risk factors for chronic diseases in the elderly. More than 15,000 subjects aged 45 years or over comprise the Rotterdam Study cohort.

For the current analysis, 7,686 adults were eligible as they had available DNA data, LDLc determinations, and outcome information. In RS, LDLc was calculated using the Friedewald equation. BMI was obtained from height and weight. T2D was defined according to WHO guidelines as a fasting glucose level  $>7$ mmol/l, non-fasting glucose level  $>11.1$ mmol/l or use of glucose-lowering medication.

The **Women's Genome Health Study** (WGHS) is a prospective cohort of initially healthy, female North American health care professionals at least 45 years old at baseline representing participants in the Women's Health Study (WHS) who provided a blood sample at baseline and consent for blood-based analyses. The WHS was a 2x2 trial beginning in 1992-1994 of vitamin E and low dose aspirin in prevention of cancer and cardiovascular disease with about 10 years of follow-up. Since the end of the trial, follow-up has continued in observational mode.

For the present analysis, we included 20,757 participants. In WGHS, LDLc was quantified using the Friedewald formula for individuals' triglycerides  $< 4.5$  mmol/L. T2D ascertainment was based on revised American Diabetes Association diagnostic criteria. Cases were confirmed if 1 or more of the following conditions were met: (1) presence of more than 1 classic symptom of hyperglycemia (i.e., polyuria, polydipsia, weight loss with or without polyphagia, and blurred vision) plus either a fasting plasma glucose  $\geq 7.0$ mmol/L or higher or random plasma glucose  $\geq 11.1$ mmol/L; (2) in the absence of symptoms, 2 or more elevated plasma glucose concentrations (fasting plasma glucose  $\geq 7.0$ mmol/L, random plasma glucose  $\geq 11.1$ mmol/L, or 2-hour plasma glucose  $\geq 11.1$ mmol/L during oral glucose tolerance testing); or (3) use of insulin or an oral hypoglycemic agent. The primary care physician's office was contacted for supporting documentation as necessary.

## Appendix 2

### Pre-specified analysis plan

#### 1. General methodological considerations

Participating cohort studies that had agreed to collaborate in this effort are listed below.

Main exclusion: History of previous cardiovascular events, including individuals with coronary heart disease, cerebrovascular disease, or peripheral artery disease. We also excluded participants with missing T2D status and those with missing genotype data (It was considered missing genotype data if a particular participant does not have any genetic information).

##### 1.1 Primary outcome and exposures

###### Outcome:

Prevalent T2D;

Definition:  $\geq 7\text{mmol/l}$  (126mg/dl), random plasma glucose  $\geq 11.1\text{mmol/L}$  (200mg/dl), being on diabetes medications or self-reported diagnosis.

###### Exposure definitions:

We will generate a predicted value for both LDLc and BMI. To generate these predicted values, we will use three different sets of genetic variants including: a) genetic variants associated with LDLc only, b) genetic variants associated with BMI only, and c) genetic variants associated with both LDLc and BMI.

Genetic instruments for LDLc were identified from the largest GWAS meta-analysis of lipid traits from UKB (Richardson TG, et al Plos Med 2020). The number of distinct genetic instruments for LDLc from this study is 232. Genetic instruments for BMI were identified from the largest GWAS meta-analysis of BMI for European ancestry participants that does not include UKB participants (Locke A, et al Nat 2015). The number of distinct genetic instruments for LDLc from this study is 75. Because several genetic variants from both datasets are overlapping, we pruned the list of 232 LDLc + 75 BMI genetic instruments based on physical distance (1MB) and pairwise LD ( $r^2 < 0.001$ ). A total of 259 distinct genetic instruments remains for the prediction of LDLc and BMI from the list of variants associated with both phenotypes.

To predict LDLc and BMI we will use genotyped variants from each participating cohort with call rate higher than 0.95 and Hardy-Weinberg equilibrium p-value higher than  $1 \times 10^{-4}$ . When not directly genotyped, we will use imputed variant based on the criteria of imputation quality (INFO)  $> 0.7$  and MACH  $r^2 > 0.8$ . If variants included in the provided SNP lists are missing in specific participating cohorts, we will use proxy variants based on available variants reaching  $r^2 > 0.8$  with the variant included in the original list.

##### 1.2 Covariates

Models will be adjusted for 1) age (years, continuous), 2) sex (male, female, categorical), 3) ancestry-derived principal components (5 or more if needed), and 4) Cohort-specific covariates such as recruitment center or family relatedness should be included based on each specific case. For multi-ancestry cohorts, we will stratify individual analyses by major ethnic groups including a) European descent, b) African American, and c) Asian

##### 1.4 Unit of analysis

To facilitate these analyses, and to enable a uniform approach to analyses across the participating consortia/studies, the Coordinating Center will provide R software scripts for direct use (or adaptation as needed). For example. For obtaining predicted values we will need to add all the genetic instruments separately in a regression model rather than combining them into a polygenic score. Estimated effect sizes will be reported per 1SD change in main exposures of interest.

## 1.5 Subgroup analysis

For multi-ancestry cohorts, we will stratify individual analyses by major ethnic groups including a) European descent, b) African American, and c) Asian

## 2. Statistical analyses

1. Each cohort lists whether information on LDLc and BMI genetic instruments discovered to date are available either via direct genotyping or via imputation with a sufficient imputation quality. We acknowledge that not all studies have full information on these genetic variants. However, a table providing the specific variants available by each study will clarify the exclusions made in the main analyses.

2. Each cohort will provide basic descriptive statistics (mean (SD), min, max) of main exposures and outcome of interest.

3. The following cohort-level characteristics at baseline will be provided:

1. Total number of participants
2. Total number of T2D cases
3. Country and region (i.e., Europe, North America).
4. Mean (SD) of LDLc
5. Mean (SD) of BMI
6. Mean (SD) of age
7. Number (%) of sex
8. Number (%) of participants of European, African American, or Asian descent
9. Mean (SD) of fasting glucose
10. Number (%) of participants with dyslipidemia
11. Mean (SD) of total cholesterol
12. Mean (SD) of HDLc
13. Mean (SD) of triglycerides
14. Ascertainment methods for T2D adjudication (i.e., fasting/non-fasting glucose determinations, treatment with either insulin or a hypoglycemic drug at follow-up examinations, or by reviewing medical record).
15. Method of assessment of LDLc.
16. Method of assessment of BMI.
17. Method of genotyping imputation panels, and quality metrics

The analysis plan is divided in three steps to calculate the total effect, the indirect effect, and the direct effect.

### Step 1. Total effect of LDLc on T2D:

#### 1.1 Generate predicted LDLc:

- Fit a linear regression without the addition of any covariates to obtain a predicted value for LDLc ( $LDLc \sim \beta_1 SNP1 + \beta_2 SNP2 + \beta_3 SNP3 + \dots + \beta_{232} SNP232$ ; script was used in FHS was provided).
- LDLc should be in mg/dl, so if your cohort has LDLc in mmol/L please transform this variable to mg/dl before predicting LDLc (multiply mmol/L by 38.67 to obtain mg/dl).
- The output is a new variable which includes the fitted values from this model (i.e., predicted values). We denote the value for each participant as LDLc.232.

#### 1.2 Obtain T2D estimates:

- Fit a regression model for T2D with LDLc.232 and covariates ( $T2D \sim \beta_{LDL} LDLc.232 + \beta_{CovLDL} covariates$ ). The output from this analysis is  $\beta_{LDL} LDLc.232$ . We will internally denote  $\beta_{LDL} LDLc.232$  as  $T_1$ .
- *We will meta-analyze all  $T_1$  to obtain the total effect of LDLc on T2D.*

### Step 2. Indirect effect of LDLc on T2D:

#### 2.1 Obtain the effect of the exposure on the mediator:

- Use the previously generated LDLc.232 variable to calculate the effect of LDLc on BMI. Regression model for BMI with LDLc.232 and covariates ( $BMI \sim \beta_{LDL} LDLc.232 + \beta_{CovLDL} covariates$ ).
- The output from this analysis is  $\beta_{LDL} LDLc.232$ . We will internally denote  $\beta_{LDL} LDLc.232$  from this model as  $\alpha_1$ .
- *We will meta-analyze all  $\alpha_1$  to obtain the effect of LDLc on BMI.*

## 2.2 Obtain the effect of the mediator on the outcome:

### 2.2.1 Generate predicted BMI:

- Fit a linear regression without the addition of any covariates to obtain a predicted value for BMI ( $BMI \sim \beta_1 SNP1 + \beta_2 SNP2 + \beta_3 SNP3 + \dots + \beta_{75} SNP75$ ).
- BMI should be in  $kg/m^2$
- The output is a new variable which includes the fitted values from this model. We denote the value for each participant BMI.75.

### 2.2.1 Obtain T2D estimates:

- Fit a regression model for T2D with BMI.75 and covariates ( $T2D \sim \beta_{BMI} BMI.75 + \beta_{CovBMI} covariates$ ).
- The output from this analysis is  $\beta_{BMI} BMI.75$ . We will internally denote  $\beta_{BMI} BMI.75$  as  $\beta_2$
- *We will meta-analyze all  $\beta_2$  to obtain the effect of BMI on T2D.*
- *To obtain the indirect effect we will use the product of coefficients method ( $\alpha_1 * \beta_2$ ).*

## **Step 3. Direct effect of LDLc on T2D:**

### 3.1 Obtain predicted LDLc:

- Fit a linear regression without the addition of any covariates to obtain a predicted value for LDLc. ( $LDLc \sim \beta_1 SNP1 + \beta_2 SNP2 + \beta_3 SNP3 + \dots + \beta_{259} SNP259$ ).
- The output is a new variable with the fitted values from this model. We denote the value for each participant LDLc.hat

### 3.2 Obtain predicted BMI:

- Fit a linear regression without the addition of any covariates to obtain a predicted value for BMI. ( $BMI \sim \beta_1 SNP1 + \beta_2 SNP2 + \beta_3 SNP3 + \dots + \beta_{259} SNP259$ ).
- The output is a new variable with the fitted values from this model. We denote the value for each participant as BMI.hat.

### 3.3 Obtain estimates effect sizes on T2D:

- Fit a regression model with both predictors and covariates:  $T2D \sim \beta_{LDLadj} LDLc.hat + \beta_{BMIadj} BMI.hat + \beta_{CovAdj} covariates$
- The output from this model is  $\beta_{LDLadj} LDLc.hat$ . We will internally denote  $\beta_{LDLadj} LDLc.hat$  as  $\beta_1$
- *We will meta-analyze all  $\beta_1$  to obtain the direct effect of LDLc on T2D.*

## **3. List of cohorts that had agreed to collaborate in this effort**

Coronary Artery Risk Development in Young Adults (CARDIA), USA. The Cardiovascular Health Study (CHS), USA. The Danish General Suburban Population Study (GESUS), Denmark. The European Prospective Investigation into Cancer and Nutrition-Potsdam (EPIC-Potsdam) study, Germany. The Family Heart Study (FHS), USA. The Framingham Heart Study (FHS), USA. The Hispanic Community Health Study / Study of Latinos (HCHS/SOL), USA. The Jackson Heart Study (JHS), USA. The Johns Hopkins Genetic Study of Atherosclerosis Risk (GeneSTAR), USA. The Malmö Diet and Cancer-Cardiovascular Cohort study (MDC-CC), Sweden. The Mass General Brigham Biobank (MGBB), USA. The Multi-Ethnic Study of Atherosclerosis (MESA), USA. the Rotterdam Study (RS) The Netherlands. The Women's Genome Health Study (WGHS), USA.

(List in alphabetical order, updated January 2021).

## Appendix 3

### Acknowledgement of sources of funding for participating cohort studies

The **Coronary Artery Risk Development in Young Adults** study is conducted and supported by the National Heart, Lung, and Blood Institute (NHLBI) in collaboration with the University of Alabama at Birmingham (HHSN268201800005I & HHSN268201800007I), Northwestern University (HHSN268201800003I), University of Minnesota (HHSN268201800006I), and Kaiser Foundation Research Institute (HHSN268201800004I).

The **Cardiovascular Health Study** research reported in this article was supported by NHLBI contracts 75N92021D00006, HHSN268201200036C, HHSN268200800007C, HHSN268201800001C, N01HC55222, N01HC85079, N01HC85080, N01HC85081, N01HC85082, N01HC85083, N01HC85086; and NHLBI grants U01HL080295, R01HL087652, R01HL105756, R01HL103612, R01HL120393, and U01HL130114 with additional contribution from the National Institute of Neurological Disorders and Stroke. Additional support was provided through R01AG023629 from the National Institute on Aging. The provision of genotyping data was supported in part by the National Center for Advancing Translational Sciences, CTSI grant UL1TR000124, and the National Institute of Diabetes and Digestive and Kidney Disease Diabetes Research Center grant DK063491 to the Southern California Diabetes Endocrinology Research Center. A full list of principal CHS investigators and institutions can be found at CHS-NHLBI.org. The content is solely the responsibility of the authors and does not necessarily represent the official views of the National Institutes of Health.

The **Danish General Suburban Population Study** GESUS was funded by the Region Zealand Foundation, Naestved Hospital Foundation. Edith and Henrik Henriksens Memorial Scholarship, Johan and Lise Boserup Foundation, TrygFonden, Johannes Fog's Foundation, Region Zealand, Naestved Hospital, The National Board of Health, and the Local Government Denmark Foundation.

The recruitment phase of the **EPIC-Potsdam** study was supported by the Federal Ministry of Science, Germany (01 EA 9401) and the European Union (SOC 95201408 05F02). The follow-up of the EPIC-Potsdam study was supported by German Cancer Aid (70-2488-Ha I) and the European Community (SOC 98200769 05F02). This work was supported by a grant from the German Ministry of Education and Research (BMBF) and the State of Brandenburg (DZD grant 82DZD00302).

The **Family Heart Study** is conducted and supported by the National Heart, Lung, and Blood Institute (NHLBI) R01HL117078 and by NIDDK R01-DK-089256

The **Framingham Heart Study** was conducted using data and resources from the Framingham Heart Study of the National Heart Lung and Blood Institute of the National Institutes of Health and Boston University School of Medicine. The analyses reflect intellectual input and resource development from the Framingham Heart Study investigators participating in the SNP Health Association Resource (SHARe) project. This work was partially supported by the National Heart, Lung and Blood Institute's Framingham Heart Study (Contract No. N01-HC-25195) and its contract with Affymetrix, Inc for genotyping services (Contract No. N02-HL-6-4278).

The **Hispanic Community Health Study/Study of Latinos** is a collaborative study supported by contracts from the National Heart, Lung, and Blood Institute (NHLBI) to the University of North Carolina (HHSN268201300001I / N01-HC-65233), University of Miami (HHSN268201300004I / N01-HC-65234), Albert Einstein College of Medicine (HHSN268201300002I / N01-HC-65235), University of Illinois at Chicago (HHSN268201300003I / N01-HC-65236 Northwestern Univ), and San Diego State University (HHSN268201300005I / N01-HC-65237). The following Institutes/Centers/Offices have contributed to the HCHS/SOL through a transfer of funds to the NHLBI: National Institute on Minority Health and Health Disparities, National Institute on Deafness and Other Communication Disorders, National Institute of Dental and Craniofacial Research, National Institute of Diabetes and Digestive and Kidney Diseases, National Institute of Neurological Disorders and Stroke, NIH Institution-Office of Dietary Supplements. The Genetic Analysis Center at the University of Washington was supported by NHLBI and NIDCR contracts (HHSN268201300005C AM03 and MOD03).



**The Jackson Heart Study** is supported and conducted in collaboration with Jackson State University (HHSN268201800013I), Tougaloo College (HHSN268201800014I), the Mississippi State Department of Health (HHSN268201800015I) and the University of Mississippi Medical Center (HHSN268201800010I, HHSN268201800011I and HHSN268201800012I) contracts from the National Heart, Lung, and Blood Institute (NHLBI) and the National Institute on Minority Health and Health Disparities (NIMHD). The authors also wish to thank the staffs and participants of the JHS. The views expressed in this manuscript are those of the authors and do not necessarily represent the views of the National Heart, Lung, and Blood Institute; the National Institutes of Health; or the U.S. Department of Health and Human Services.

The **Johns Hopkins Genetic Study of Atherosclerosis Risk** was supported by grants from the National Institutes of Health/National Heart, Lung, and Blood Institute (U01 HL72518, HL087698, HL49762, HL59684, HL58625, HL071025, HL092165, HL099747, K23HL105897), by grants from the National Institutes of Health/National Institute of Nursing Research (NR0224103, NR008153), by a grant from the National Institutes of Health/National Institute of Neurological Disorders and Stroke (NS062059), by a grant from the National Institutes of Health/National Center for Research Resources (M01-RR000052) to the Johns Hopkins General Clinical Research Center, and by a grant from the National Center for Advancing Translational Sciences, National Institutes of Health (UL1TR001079) to the Johns Hopkins Institute for Clinical & Translational Research.

The **Malmö Diet and Cancer-Cardiovascular Cohort study** was supported by the Swedish Research Council, the Swedish Heart and Lung Foundation, the Novo Nordic Foundation, the Swedish Diabetes Foundation, and the Pålsson Foundation, and by equipment grants from the Knut and Alice Wallenberg Foundation, the Region Skåne, Skåne University Hospital, the Linneus Foundation for the Lund University Diabetes Center and the European Research Council.

The **Mass General Brigham Biobank** was supported by funds from Partners HealthCare which includes Massachusetts General Hospital and Brigham and Women's Hospital.

The **Multi-Ethnic Study of Atherosclerosis** study and the MESA SHARe projects are conducted and supported by the National Heart, Lung, and Blood Institute (NHLBI) in collaboration with MESA investigators. Support for MESA is provided by contracts 75N92020D00001, HHSN268201500003I, N01-HC-95159, 75N92020D00005, N01-HC-95160, 75N92020D00002, N01-HC-95161, 75N92020D00003, N01-HC-95162, 75N92020D00006, N01-HC-95163, 75N92020D00004, N01-HC-95164, 75N92020D00007, N01-HC-95165, N01-HC-95166, N01-HC-95167, N01-HC-95168, N01-HC-95169, UL1-TR-000040, UL1-TR-001079, UL1-TR-001420. Funding for SHARe genotyping was provided by NHLBI Contract N02-HL-64278. Genotyping was performed at Affymetrix (Santa Clara, California, USA) and the Broad Institute of Harvard and MIT (Boston, Massachusetts, USA) using the Affymetrix Genome-Wide Human SNP Array 6.0. Also supported in part by the National Center for Advancing Translational Sciences, CTSI grant UL1TR001881, and the National Institute of Diabetes and Digestive and Kidney Disease Diabetes Research Center (DRC) grant DK063491 to the Southern California Diabetes Endocrinology Research Center.

The **Rotterdam Study** is funded by Erasmus Medical Center and Erasmus University, Rotterdam, Netherlands Organization for the Health Research and Development (ZonMw), the Research Institute for Diseases in the Elderly (RIDE), the Ministry of Education, Culture and Science, the Ministry for Health, Welfare and Sports, the European Commission (DG XII), and the Municipality of Rotterdam. The authors are grateful to the study participants, the staff from the Rotterdam Study and the participating general practitioners and pharmacists.

The **Women's Genome Health Study** is supported by the National Heart, Lung, and Blood Institute (HL043851 and HL080467) and the National Cancer Institute (CA047988 and UM1CA182913), with collaborative scientific support and funding for genotyping provided by Amgen.
